# Supplementary material for: Simple molecular ferroelectrics:N,N′-dialkyl-terephthalamide derivatives in the solid phase
Source: Royal Society of Chemistry journal article supplement (doi:10.1039/d1tc05001j), 2022-01-01
Supplement: d1tc05001j1.pdf [file d1tc05001j1.pdf]

## Supporting Information

### Simple Molecular Ferroelectrics: *N,N'*-Dialkyl-terephthalamide Derivatives in Solid Phase

Moeko Kawana,<sup>a</sup> Ryohei Mizoue,<sup>a</sup> Takashi Takeda,<sup>a, b\*</sup> Norihisa Hoshino,<sup>a, b</sup> and Tomoyuki

Akutagawa<sup>a, b, c\*</sup>

<sup>a</sup> Graduate School of Engineering, Tohoku University, Sendai 980-8579, Japan.

<sup>b</sup> Institute of Multidisciplinary Research for Advanced Materials (IMRAM), Tohoku University,  
2-1-1 Katahira, Aoba-ku, Sendai 980-8577, Japan.

<sup>c</sup> National Institute for Material Science (NIMS), 1-2-1 Tsukuba, 305-0047, Japan

Institute of Multidisciplinary Research for Advanced Materials (IMRAM), Tohoku University,  
2-1-1 Katahira, Aoba-ku, Sendai 980-8577, Japan

Phone: +81-22-217-5653

Fax: +81-22-217-5655

**E-mail** [akutagawa@tohoku.ac.jp](mailto:akutagawa@tohoku.ac.jp) and [takashi@tohoku.ac.jp](mailto:takashi@tohoku.ac.jp)

## Contents

1. Experimental section.
2. TG charts of **CnTPA** (Figure S1).
3. DSC charts of the odd-number **CnTPAs** (Figures S2 and S3).
4. Phase transition behaviors of **CTPA** (Table S1).
5. Even–odd effect of transition enthalpy change (Figure S4).
6. Atomic numbering scheme of **C5TPA** (Figure S5).
7. The  $\pi$ - $\pi$  overlap mode of **C5TPA** (Figure S6).
8.  $T$ -dependent PXRD patterns of **CnTPAs** (Figures S7–S9).
9. SEM images (Figure S10).
10. The  $T$ - and  $f$ -dependent  $\varepsilon_1$  and  $\varepsilon_2$  responses (Figures S11–S23).
11. The  $P - E$  hysteresis measurement of **CnTPAs** (Figures S24–S36).
12. The IR spectra at 298 K (Figures S37 and S38).
13.  $T$ -dependent IR spectra of **CnTPAs** (Figures S39–S42).

## Experimental

**Preparations of C<sub>n</sub>TPAs.** All the **C<sub>n</sub>TPA** derivatives were prepared by the condensation reaction between terephthaloyl dichloride (50 mmol) and the corresponding C<sub>n</sub>H<sub>2n+1</sub>NH<sub>2</sub> (13 mmol) with *n* = 5–16, 18 in anhydrous THF (35 mL) in the presence of Et<sub>3</sub>N (18 mmol). The reaction mixture was stirred at 298 K for 24 h, and the white precipitate was collected by filtration. The white powder was recrystallized 2–4 times from toluene:isopropanol (v/v = 1:1).

*N,N'*-Diamyl-1,4-terephthalamide (**C5TPA**). Yield = 62 %, elemental analysis. Calc. for C<sub>18</sub>H<sub>28</sub>N<sub>2</sub>O<sub>2</sub>: C, 70.78; H, 9.27; O, 9.20; N, 10.51. Found: C, 70.78; H, 9.31; N, 9.16. <sup>1</sup>H NMR (CDCl<sub>3</sub>, 400 MHz, δ in ppm) 0.88 (6H, t, *J*=7.1 Hz, -CH<sub>3</sub>), 1.35–1.40 (8H, m, -CH<sub>2</sub>-), 1.64 (4H, quin, *J*=7.3 Hz, -NH-CH<sub>2</sub>-CH<sub>2</sub>-), 3.47 (4H, q, *J*=6.8 Hz, -NH-CH<sub>2</sub>-), 6.12 (2H, t, *J*=4.0 Hz, -NH-), 7.81 (4H, s, Benzene). HRMS (FAB) calc. for C<sub>18</sub>H<sub>29</sub>O<sub>2</sub>H<sub>2</sub>: 305.2229 [(M<sup>+</sup>H)<sup>+</sup>]. Found: 305.2233.

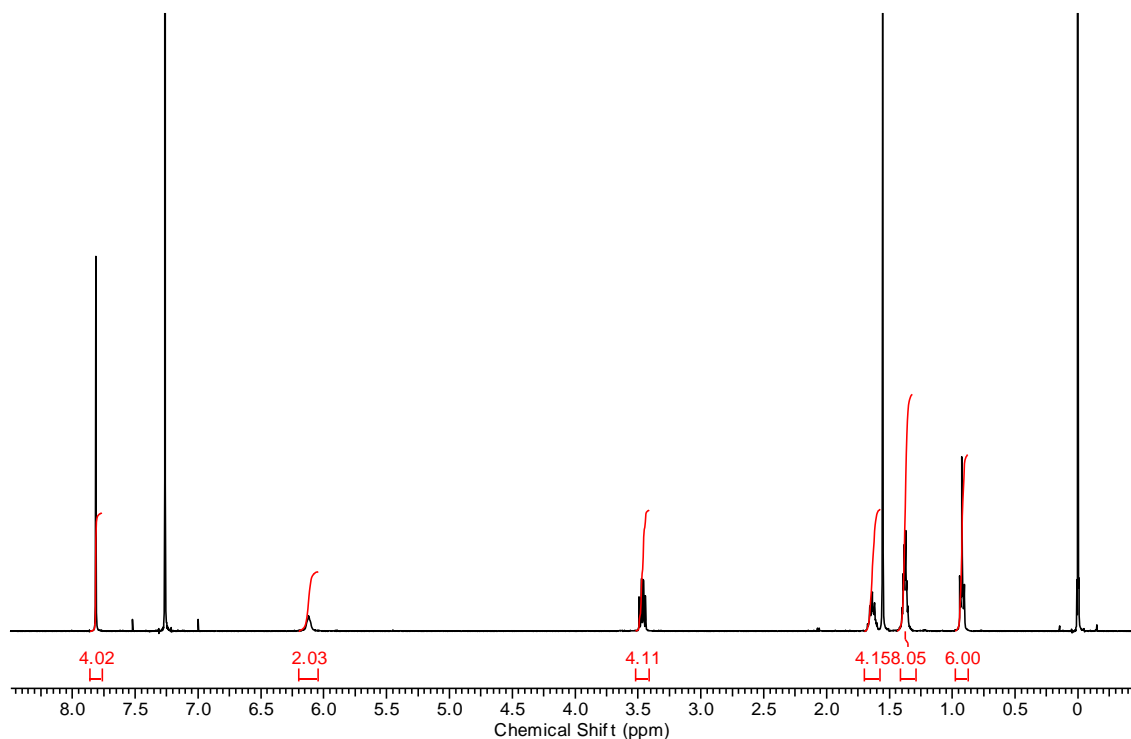

<sup>1</sup>H NMR spectrum of **C5TPA** in CDCl<sub>3</sub>.

*N,N'*-Dihexyl-1,4-terephthalamide (**C6TPA**) Elemental analysis. Calc. for C<sub>20</sub>H<sub>32</sub>N<sub>2</sub>O<sub>2</sub>: C, 72.25; H, 9.70; N, 8.41. Found: C, 72.01; H, 9.67; N, 8.41. <sup>1</sup>H NMR (CDCl<sub>3</sub>, 400 MHz, δ in ppm) 0.90 (6H, t, *J*=7.0 Hz, -CH<sub>3</sub>), 1.31–1.41 (12H, m, -CH<sub>2</sub>-), 1.63 (4H, quin, *J*=7.3 Hz, -NH-CH<sub>2</sub>-CH<sub>2</sub>-),

3.47 (4H, q,  $J=6.1$  Hz, -NH-CH<sub>2</sub>-), 6.11 (2H, t,  $J=6.41$  Hz, -NH-), 7.82 (4H, s, Benzene).

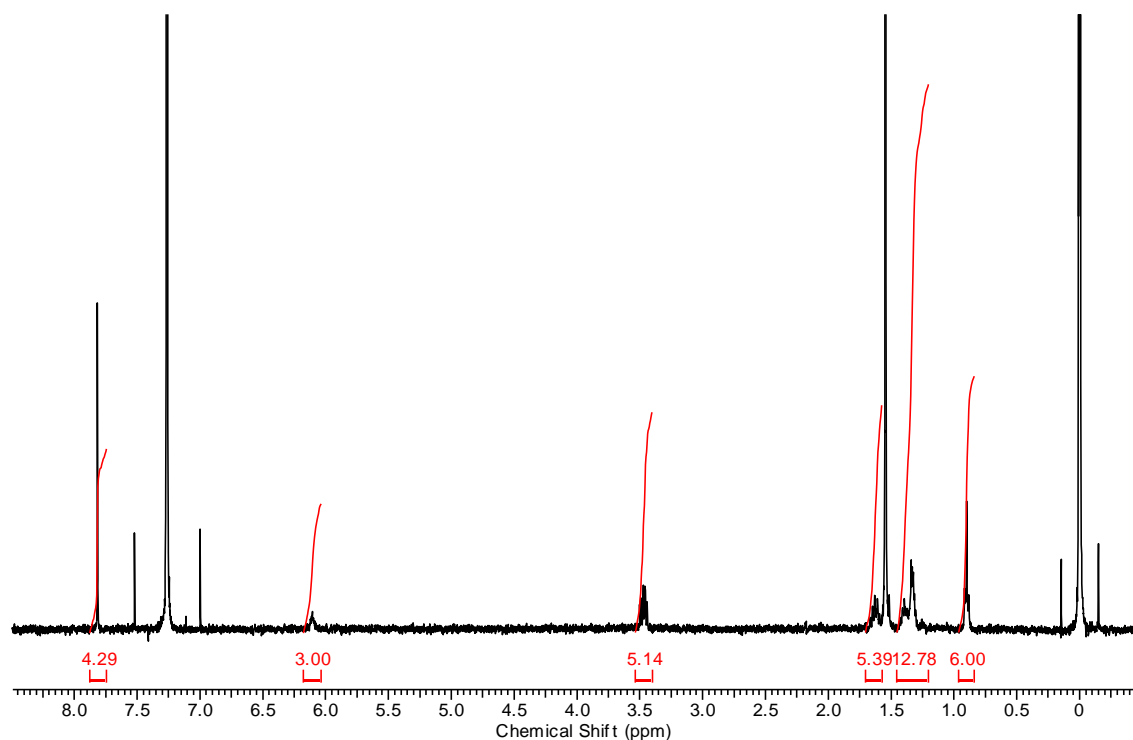

<sup>1</sup>H NMR spectrum of **C6TPA** in CDCl<sub>3</sub>.

*N,N'*-Diheptyl-1,4-terephthalamide (**C7TPA**). Yield = 65%. Elemental analysis. Calc. for C<sub>22</sub>H<sub>36</sub>N<sub>2</sub>O<sub>2</sub>: C, 73.29; H, 10.06; N, 7.77. Found: C, 73.33; H, 10.31; N, 7.77. <sup>1</sup>H NMR (CDCl<sub>3</sub>, 400 MHz,  $\delta$  in ppm) 0.89 (6H, t,  $J=6.3$  Hz, -CH<sub>3</sub>), 1.30–1.40 (16H, m, -CH<sub>2</sub>-), 1.63 (4H, quin,  $J=7.0$  Hz, -NH-CH<sub>2</sub>-CH<sub>2</sub>-), 3.46 (4H, q,  $J=6.7$  Hz, -NH-CH<sub>2</sub>-), 6.13 (2H, t,  $J=4.5$  Hz, -NH-), 7.81 (4H, s, Benzene). HRMS (FAB) calc. for C<sub>22</sub>H<sub>37</sub>O<sub>2</sub>H<sub>2</sub>: 368.2858 [(M<sup>+</sup>H)<sup>+</sup>]. Found: 368.2855.

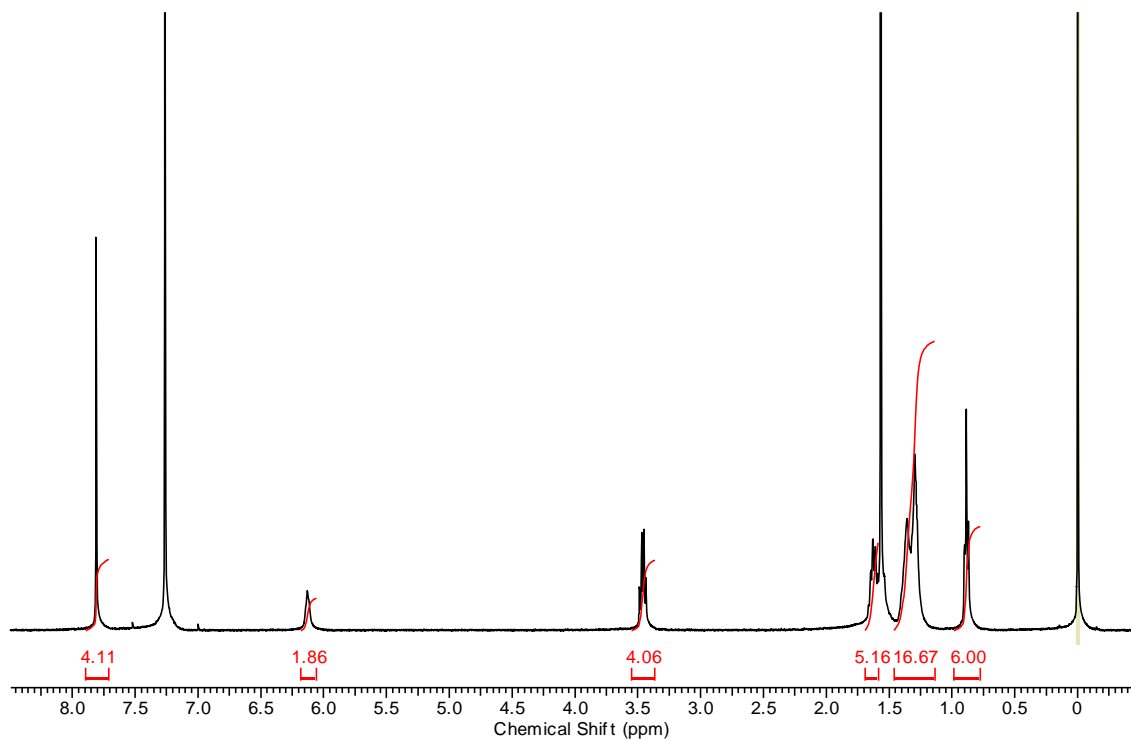

<sup>1</sup>H NMR spectrum of **C7TPA** in CDCl<sub>3</sub>.

*N,N'*-Dioctyl-1,4-terephthalamide (**C8TPA**) Yield = 90%. Elemental analysis. Calc. for C<sub>24</sub>H<sub>40</sub>N<sub>2</sub>O<sub>2</sub>: C, 74.18; H, 10.38; N, 7.21. Found: C, 74.21; H, 10.62; N, 7.20. <sup>1</sup>H NMR (CDCl<sub>3</sub>, 400 MHz, δ in ppm) 0.88 (6H, t, *J*=5.0 Hz, -CH<sub>3</sub>), 1.28–1.40 (20H, m, -CH<sub>2</sub>-), 1.63 (4H, quin, *J*=6.5 Hz, -NH-CH<sub>2</sub>-CH<sub>2</sub>-), 3.47 (4H, q, *J*=5.9 Hz, -NH-CH<sub>2</sub>-), 6.12 (2H, t, *J*=4.8 Hz, -NH-), 7.81 (4H, s, Benzene).

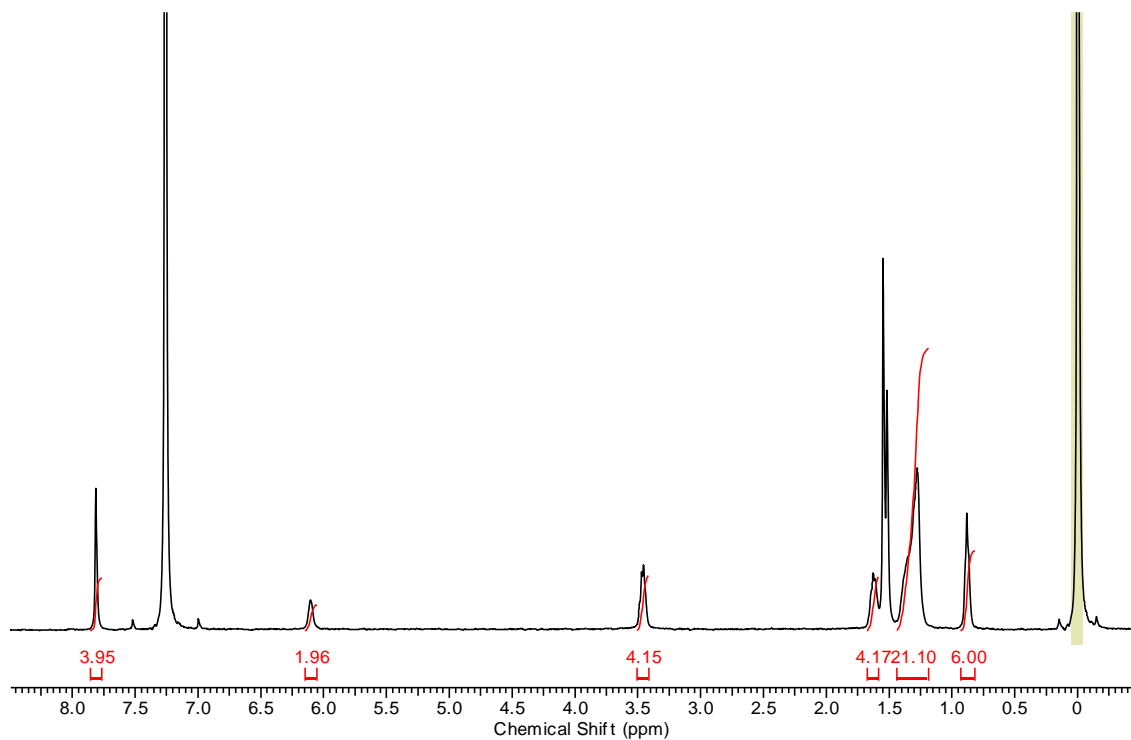

$^1\text{H}$  NMR spectrum of **C8TPA** in  $\text{CDCl}_3$ .

*N,N'*-Dinonanyl-1,4-terephthalamide (**C9TPA**) Yield = 71%. Elemental analysis. Calc. for  $\text{C}_{26}\text{H}_{44}\text{N}_2\text{O}_2$ : C, 74.95; H, 10.64; N, 6.72. Found: C, 74.79; H, 10.82; N, 6.74.  $^1\text{H}$  NMR ( $\text{CDCl}_3$ , 400 MHz,  $\delta$  in ppm) 0.88 (6H, t,  $J=7.0$  Hz,  $-\text{CH}_3$ ), 1.27–1.40 (24H, m,  $-\text{CH}_2-$ ), 1.63 (4H, quin,  $J=7.3$  Hz,  $-\text{NH}-\text{CH}_2-\text{CH}_2-$ ), 3.47 (4H, q,  $J=6.7$  Hz,  $-\text{NH}-\text{CH}_2-$ ), 6.10 (2H, t,  $J=4.6$  Hz,  $-\text{NH}-$ ), 7.81 (4H, s, Benzene). HRMS (FAB) calc. for  $\text{C}_{26}\text{H}_{45}\text{O}_2\text{H}_2$ : 417.3481 [ $(\text{M}^+\text{H})^+$ ]. Found: 417.3479.

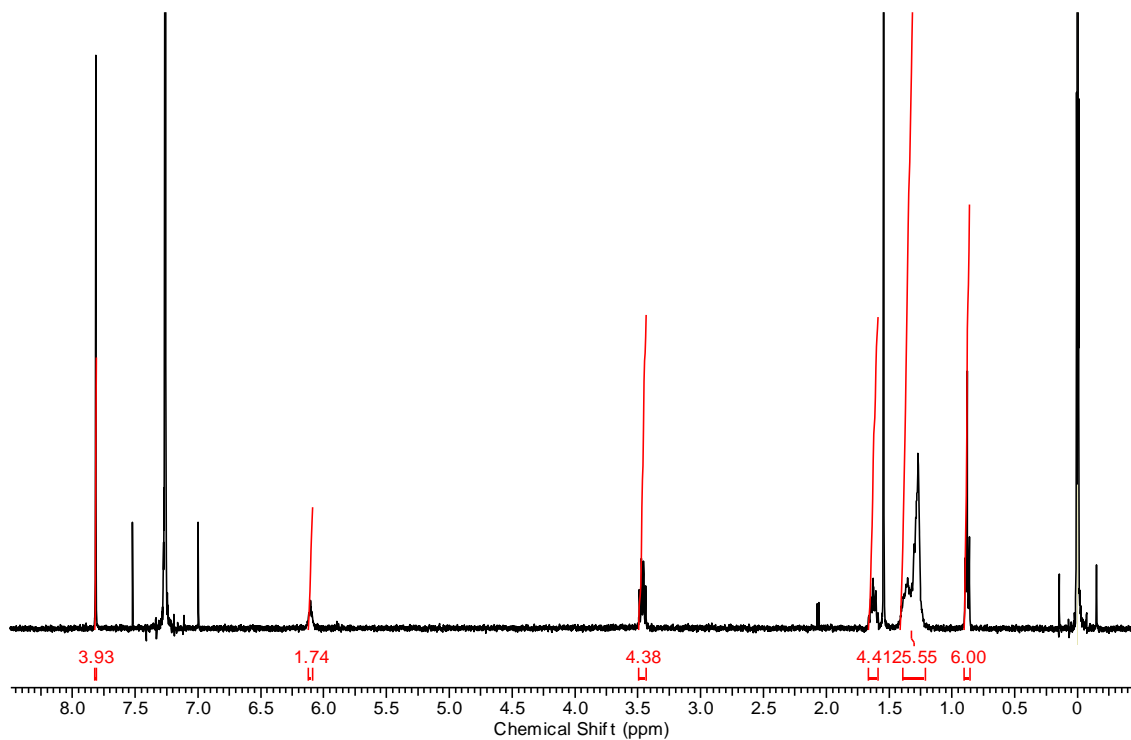

$^1\text{H}$  NMR spectrum of **C9TPA** in  $\text{CDCl}_3$ .

*N,N'*-Didecyl-1,4-terephthalamide (**C10TPA**) Yield = 83%. Elemental analysis. Calc. for  $\text{C}_{28}\text{H}_{48}\text{N}_2\text{O}_2$ : C, 75.63; H, 10.88; N, 6.30. Found: C, 75.59; H, 10.89; N, 6.30.  $^1\text{H}$  NMR ( $\text{CDCl}_3$ , 400 MHz,  $\delta$  in ppm) 0.88 (6H, t,  $J=5.0$  Hz,  $-\text{CH}_3$ ), 1.28–1.40 (20H, m,  $-\text{CH}_2-$ ), 1.63 (4H, quin,  $J=6.5$  Hz,  $-\text{NH}-\text{CH}_2-\text{CH}_2-$ ), 3.47 (4H, q,  $J=5.9$  Hz,  $-\text{NH}-\text{CH}_2-$ ), 6.12 (2H, t,  $J=4.8$  Hz,  $-\text{NH}-$ ), 7.81 (4H, s, Benzene). HRMS (FAB) calc. for  $\text{C}_{18}\text{H}_{29}\text{O}_2\text{H}_2$ : 368.2858 [ $\text{M}^+\text{H}^+$ ]. Found: 368.2855.

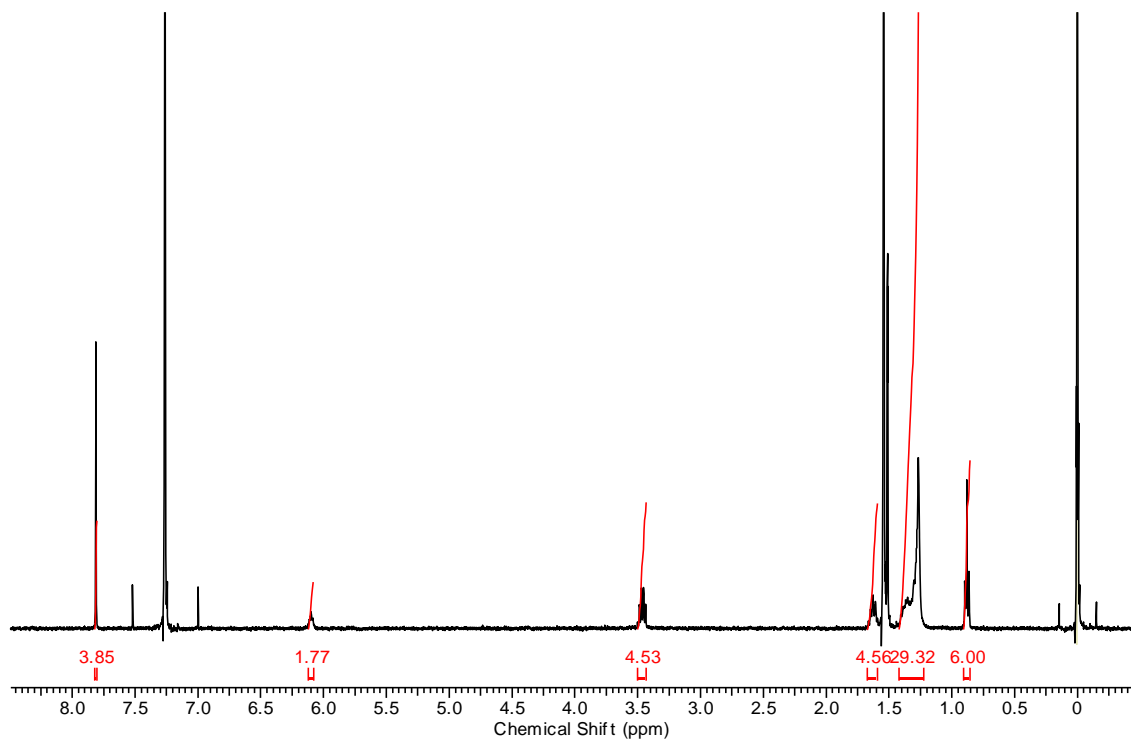

$^1\text{H}$  NMR spectrum of **C10TPA** in  $\text{CDCl}_3$ .

*N,N'*-Dimonodecyl-1,4-terephthalamide (**C11TPA**) Yield = 78%. Elemental analysis. Calc. for  $\text{C}_{28}\text{H}_{48}\text{N}_2\text{O}_2$ : C, 76.22; H, 11.09; N, 5.93. Found: C, 76.03; H, 11.09; N, 6.01.  $^1\text{H}$  NMR ( $\text{CDCl}_3$ , 400 MHz,  $\delta$  in ppm) 0.88 (6H, t,  $J=6.8$  Hz,  $-\text{CH}_3$ ), 1.26~1.40 (32H, m,  $-\text{CH}_2-$ ), 1.63 (4H, quin,  $J=7.3$  Hz,  $-\text{NH}-\text{CH}_2-\text{CH}_2-$ ), 3.46 (4H, q,  $J=6.7$  Hz,  $-\text{NH}-\text{CH}_2-$ ), 6.10 (2H, t,  $J=4.7$  Hz,  $-\text{NH}-$ ), 7.81 (4H, s, Benzene). HRMS (FAB) calc. for  $\text{C}_{30}\text{H}_{53}\text{O}_2\text{H}_2$ : 473.4107 [ $(\text{M}^+\text{H})^+$ ]. Found: 473.4110.



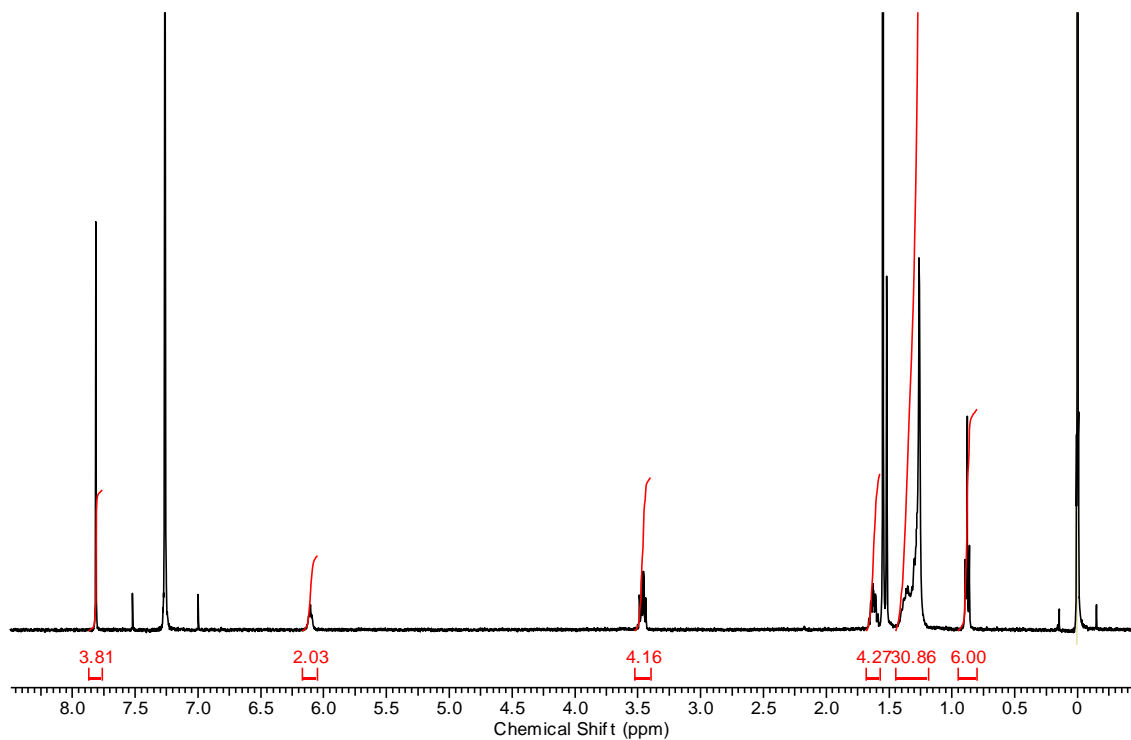

<sup>1</sup>H NMR spectrum of **C11TPA** in CDCl<sub>3</sub>.

*N,N'*-Didodecyl-1,4-terephthalamide (**C12TPA**) Yield = 86%. Elemental analysis. Calc. for C<sub>32</sub>H<sub>56</sub>N<sub>2</sub>O<sub>2</sub>: C, 76.75; H, 11.27; N, 5.59. Found: C, 76.77; H, 11.40; N, 5.63. <sup>1</sup>H NMR (CDCl<sub>3</sub>, 400 MHz, δ in ppm) 0.88 (6H, t, *J*=6.5 Hz, -CH<sub>3</sub>), 1.26~1.40 (36H, m, -CH<sub>2</sub>-), 1.63 (4H, quin, *J*=7.1 Hz, -NH-CH<sub>2</sub>-CH<sub>2</sub>-), 3.46 (4H, q, *J*=6.4 Hz, -NH-CH<sub>2</sub>-), 6.10 (2H, t, *J*=5.6 Hz, -NH-), 7.81 (4H, s, Benzene).

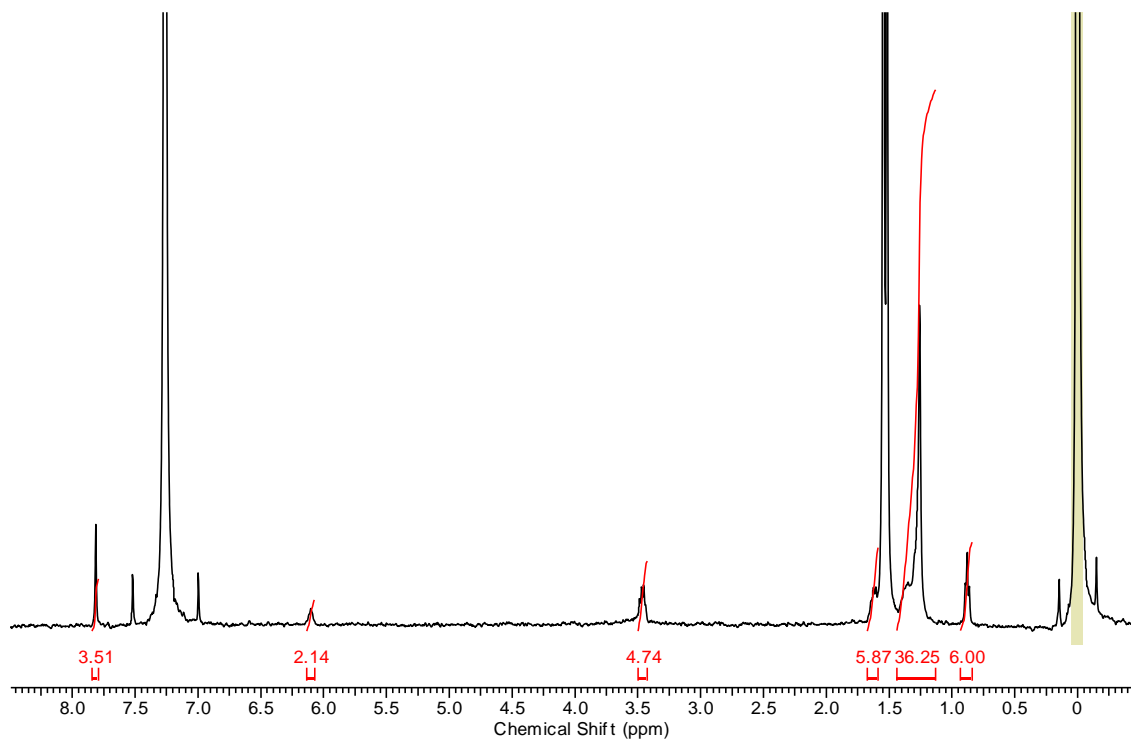

$^1\text{H}$  NMR spectrum of **C12TPA** in  $\text{CDCl}_3$ .

*N,N'*-Ditridecyl-1,4-terephthalamide (**C13TPA**) Yield = 71%. Elemental analysis. Calc. for  $\text{C}_{34}\text{H}_{60}\text{N}_2\text{O}_2$ : C, 77.22; H, 11.44; N, 5.30. Found: C, 76.99; H, 11.48; N, 5.40.  $^1\text{H}$  NMR ( $\text{CDCl}_3$ , 400 MHz,  $\delta$  in ppm) 0.88 (6H, t,  $J=6.8$  Hz,  $-\text{CH}_3$ ), 1.26~1.38 (40H, m,  $-\text{CH}_2-$ ), 1.63 (4H, quin,  $J=6.3$  Hz,  $-\text{NH}-\text{CH}_2-\text{CH}_2-$ ), 3.46 (4H, q,  $J=6.9$  Hz,  $-\text{NH}-\text{CH}_2-$ ), 7.81 (4H, s, Benzene). HRMS (FAB) calc. for  $\text{C}_{34}\text{H}_{61}\text{O}_2\text{H}_2$ : 529.4733 [ $(\text{M}^+\text{H})^+$ ]. Found: 529.4738.

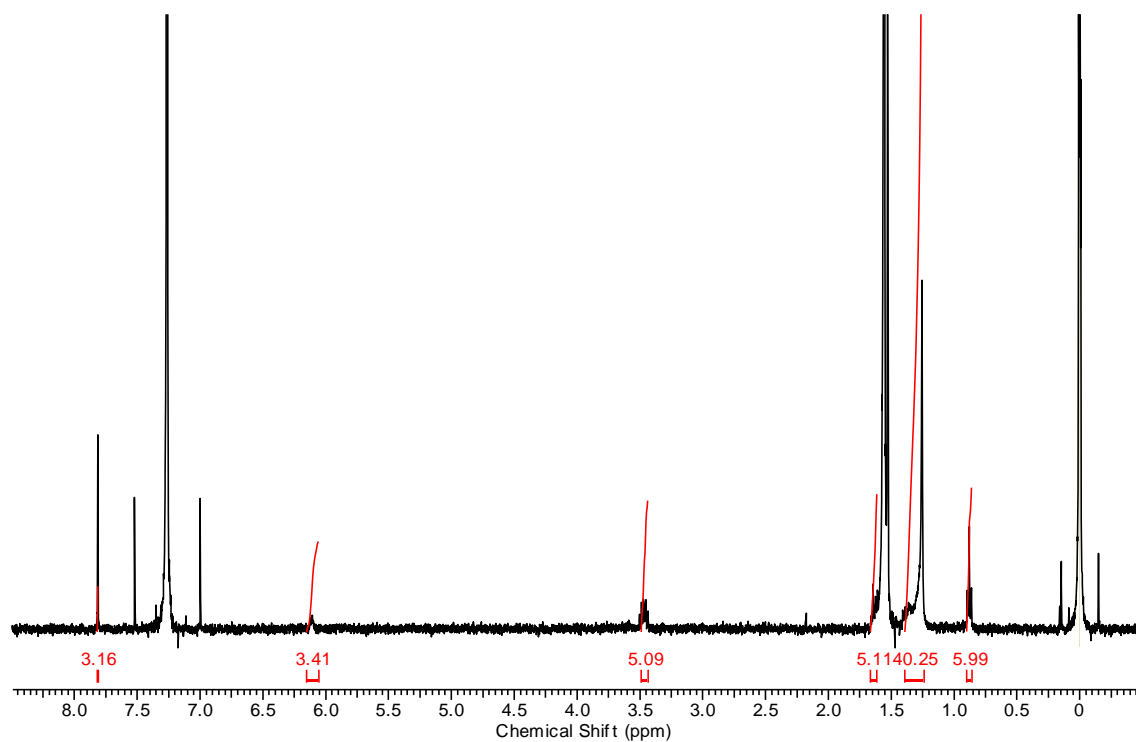

<sup>1</sup>H NMR spectrum of **C13TPA** in CDCl<sub>3</sub>.

*N,N'*-Ditetradecyl-1,4-terephthalamide (**C14TPA**) Yield = 75%. Elemental analysis. Calc. for C<sub>36</sub>H<sub>64</sub>N<sub>2</sub>O<sub>2</sub>: C, 77.64; H, 11.58; N, 5.03. Found: C, 77.62; H, 11.66; N, 5.03. <sup>1</sup>H NMR at 318 K (CDCl<sub>3</sub>, 400 MHz, δ in ppm) 0.88 (6H, t, *J*=6.9 Hz, -CH<sub>3</sub>), 1.26–1.40 (44H, m, -CH<sub>2</sub>-), 1.62 (4H, quin, *J*=7.3 Hz, -NH-CH<sub>2</sub>-CH<sub>2</sub>-), 3.46 (4H, q, *J*=6.7 Hz, -NH-CH<sub>2</sub>-), 6.04 (2H, t, *J*=5.0 Hz, -NH-), 7.80 (4H, s, Benzene).

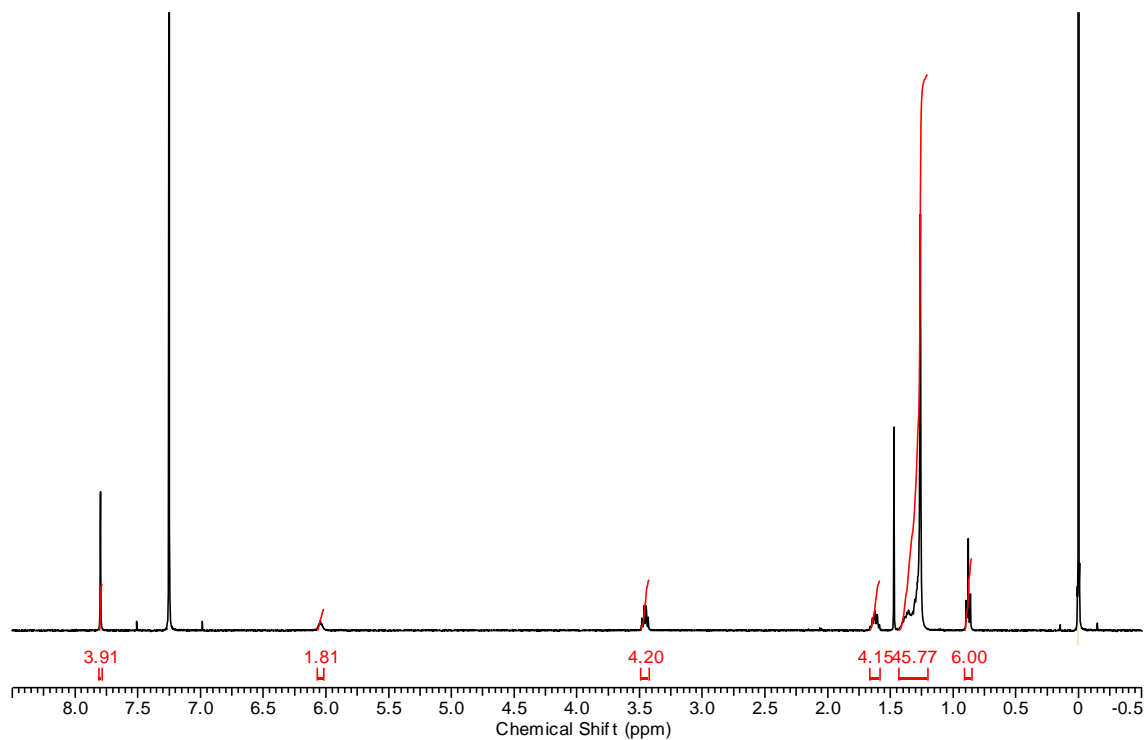

<sup>1</sup>H NMR spectrum of **C14TPA** in CDCl<sub>3</sub>.

*N,N'*-Dipentadecyl-1,4-terephthalamide (**C15TPA**) Yield = 89%. Elemental analysis. Calc. for C<sub>38</sub>H<sub>68</sub>N<sub>2</sub>O<sub>2</sub>: C, 78.02; H, 11.86; N, 4.77. Found: C, 78.02; H, 11.72; N, 4.79. <sup>1</sup>H NMR at 319 K (CDCl<sub>3</sub>, 400 MHz, δ in ppm) 0.88 (6H, t, *J*=6.8 Hz, -CH<sub>3</sub>), 1.26–1.40 (48H, m, -CH<sub>2</sub>-), 1.63 (4H, quin, *J*=7.2 Hz, -NH-CH<sub>2</sub>-CH<sub>2</sub>-), 3.46 (4H, q, *J*=6.8 Hz, -NH-CH<sub>2</sub>-), 6.04 (2H, t, *J* =6.1 Hz, -NH-), 7.80 (4H, s, Benzene). HRMS (FAB) calc. for C<sub>38</sub>H<sub>68</sub>O<sub>2</sub>N<sub>2</sub>: 585.5359 [(M<sup>+</sup>H)<sup>+</sup>]. Found : 585.5356.

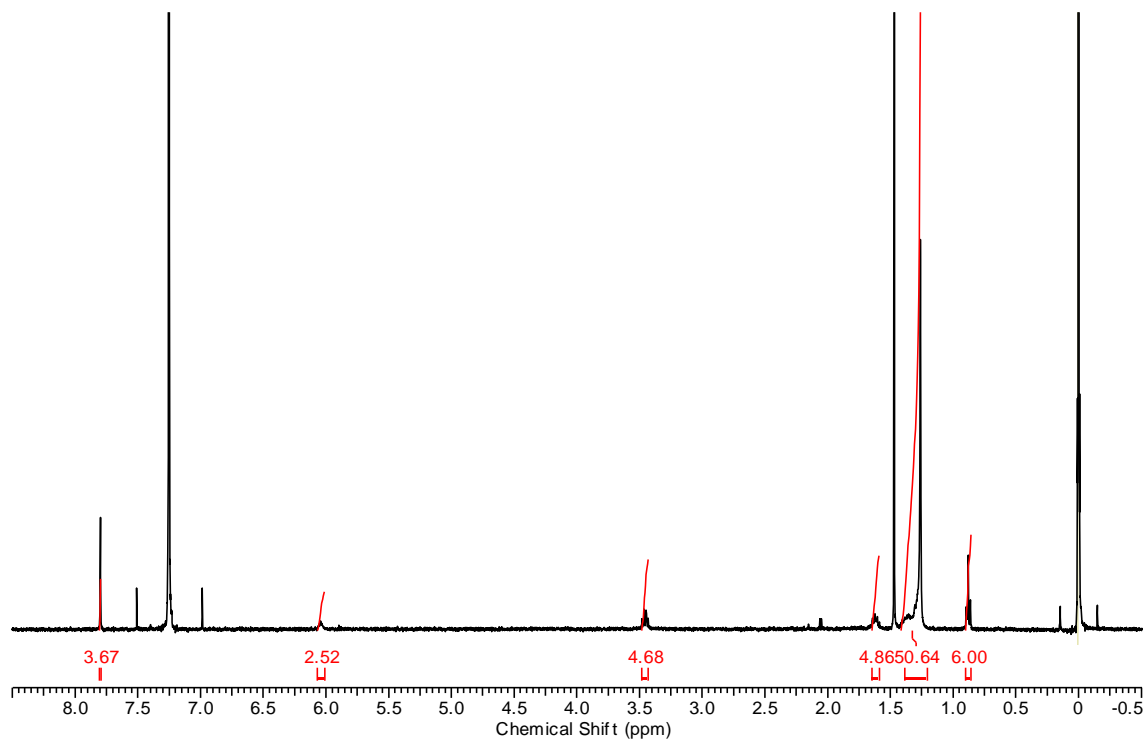

<sup>1</sup>H NMR spectrum of **C15TPA** in CDCl<sub>3</sub>.

*N,N'*-Dihexadecyl-1,4-terephthalamide (**C16TPA**) Yield = 84%. Elemental analysis. Calc. for C<sub>40</sub>H<sub>72</sub>N<sub>2</sub>O<sub>2</sub>: C, 78.37; H, 11.84; N, 4.57. Found: C, 78.35; H, 11.93; N, 4.60. <sup>1</sup>H NMR at 318 K (CDCl<sub>3</sub>, 400 MHz, δ in ppm) 0.88 (6H, t, *J*=6.9 Hz, -CH<sub>3</sub>), 1.26–1.39 (52H, m, -CH<sub>2</sub>-), 1.62 (4H, quin, *J*=7.3 Hz, -NH-CH<sub>2</sub>-CH<sub>2</sub>-), 3.46 (4H, q, *J*=6.7 Hz, -NH-CH<sub>2</sub>-), 6.04 (2H, t, *J*=5.9 Hz, -NH-), 7.80 (4H, s, Benzene).

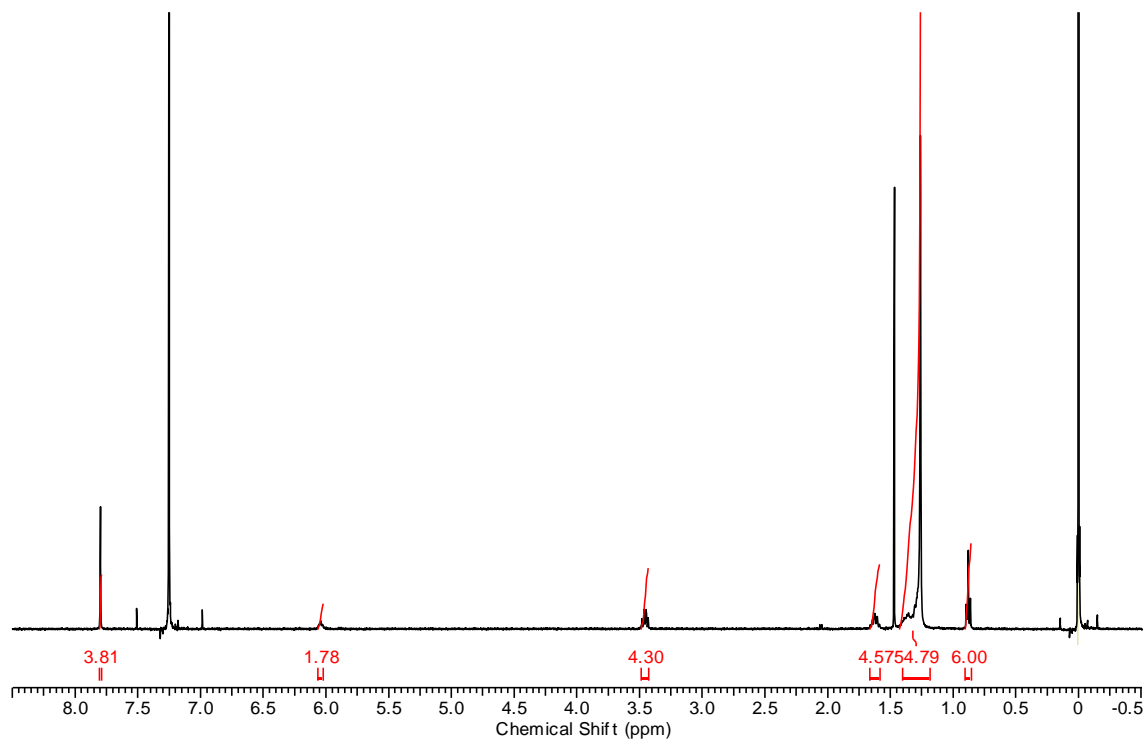

$^1\text{H}$  NMR spectrum of **C16TPA** in  $\text{CDCl}_3$ .

*N,N'*-Dioctadecyl-1,4-terephthalamide (**C18TPA**) Yield = 90%. Elemental analysis. Calc. for  $\text{C}_{44}\text{H}_{80}\text{N}_2\text{O}_2$ : C, 78.98; H, 12.05; N, 4.19. Found: C, 78.98; H, 11.85; N, 4.48.  $^1\text{H}$  NMR at 318 K ( $\text{CDCl}_3$ , 400 MHz,  $\delta$  in ppm), 0.88 (6H, t,  $J=6.8$  Hz,  $-\text{CH}_3$ ), 1.26–1.38 (56H, m,  $-\text{CH}_2-$ ), 1.62 (4H, quin,  $J=7.5$  Hz,  $-\text{NH}-\text{CH}_2-\text{CH}_2-$ ), 3.46 (4H, q,  $J=6.8$  Hz,  $-\text{NH}-\text{CH}_2-$ ), 6.04 (2H, t,  $J=5.0$  Hz,  $-\text{NH}-$ ), 7.80 (4H, s, Benzene).

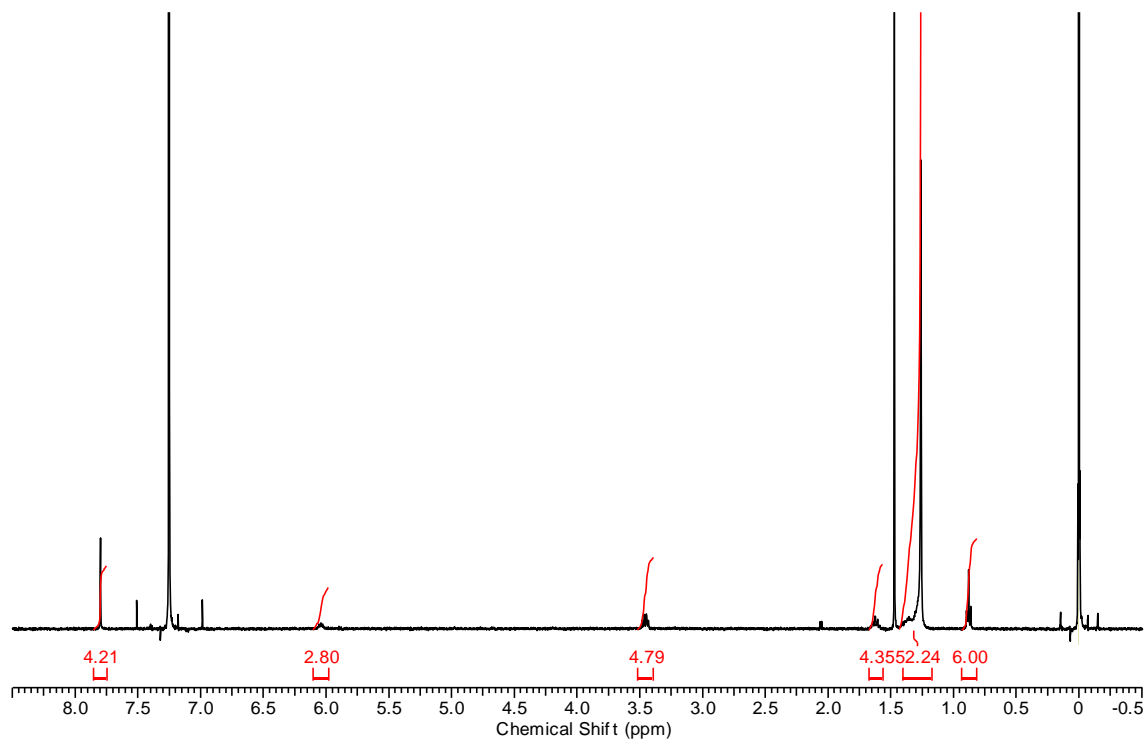

$^1\text{H}$  NMR spectrum of **C18TPA** in  $\text{CDCl}_3$ .

**Physical measurements.**  $^1\text{H}$  NMR spectra were recorded using a Bruker Avance III 400 NMR spectrometer, and chemical shifts ( $\delta$ , ppm) were obtained relative to tetramethylsilane as an internal standard. Temperature-dependent infrared (IR,  $400\text{--}4000\text{ cm}^{-1}$ ) spectra were measured using a Thermo Fisher Scientific Nicolet 6700 spectrophotometer with a resolution of  $1\text{ cm}^{-1}$  using KBr pellets. The surface morphologies of the molecular assemblies on a highly oriented pyrolytic graphite (HOPG) substrate were examined by scanning electron microscopy (SEM, JEOL JSM-5400F) and atomic force microscopy (AFM, Hitachi 5100N). Thin films were fabricated on the surfaces of HOPG and mica substrates using the cast method in a chloroform solution. Thermogravimetric–differential thermal analysis (TG–DTA) was conducted using a Rigaku Thermo plus TG8120 thermal analysis station with  $\text{Al}_2\text{O}_3$  as a reference in the temperature range of  $300\text{--}780\text{ K}$  at a heating rate of  $5\text{ K min}^{-1}$  under a  $\text{N}_2$  atmosphere. Differential scanning calorimetry (DSC) was performed using a METTLER thermal analysis DSC1-TS station using  $\text{Al}_2\text{O}_3$  as a reference in the temperature range of  $173\text{--}550\text{ K}$  at heating and cooling rates of  $5\text{ K min}^{-1}$  under a  $\text{N}_2$  atmosphere. Temperature-dependent powder X-ray diffraction (PXRD) patterns were measured using a Rigaku RINT-Ultima III diffractometer with  $\text{Cu K}\alpha$  radiation at an irradiation wavelength

of  $\lambda = 1.54187 \text{ \AA}$ . Temperature-dependent dielectric constants were measured using the two-probe alternating current impedance method (HP4194A) over a frequency range of  $10^2$  to  $10^6$  Hz. Ferroelectric polarization–electric field hysteresis ( $P$ – $E$ ) curves were acquired using a commercially available ferroelectric tester (Precision LC, Radiant Technologies). Solid state samples of **CnTPA** were fabricated on an indium tin oxide (ITO) glass (SZ–A311P6N), which was sandwiched between the corresponding ITO glass to form a dielectric measurement cell with an average electrode gap of  $2 \text{ \mu m}$ .

**Crystal structure determination.** Single crystals were obtained by slowly cooling the crystallization solution. Crystallographic data were acquired using a Rigaku RAPID II diffractometer equipped with a rotating anode fitted with a multilayer confocal optic and using  $\text{Cu K}\alpha$  ( $\lambda = 1.54187 \text{ \AA}$ ) radiation from a graphite monochromator. Structural refinement was performed using the full-matrix least-squares method on  $F_2$ . Calculations were conducted using crystal structure software packages.<sup>91, 92</sup> All parameters except for those of H atoms were refined using anisotropic temperature factors. Crystallographic data of **C5TPA** ( $\text{C}_{18}\text{H}_{28}\text{N}_2\text{O}_2$ ): F.W. = 304.43; crystal dimensions:  $0.30 \times 0.20 \times 0.10 \text{ mm}^3$ ;  $T = 250 \text{ K}$ ; Triclinic  $P-1$  (#2);  $a = 5.0874(6)$ ;  $b = 5.1180(6)$ ;  $c = 16.8328(18) \text{ \AA}$ ;  $\alpha = 90.632(6)$ ,  $\beta = 97.129(7)$ ,  $\gamma = 93.262(7)^\circ$ ;  $V = 434.12(8) \text{ \AA}^3$ ;  $Z = 1$ ;  $d_{\text{calcd}} = 1.164 \text{ g cm}^{-3}$ ;  $\mu = 5.976 \text{ cm}^{-1}$ ; collected: 5123; unique: 1549;  $R_{\text{int}} = 0.0373$ ;  $R_1 = 0.0474$ ;  $R_{\text{all}} = 0.0494$ ;  $R_w = 0.1366$ ; G.O.F = 1.073; and the maximum and minimum peaks on the final difference Fourier map corresponded to  $+0.19$  and  $-0.32 \text{ e}^- \text{ \AA}^{-3}$ . CCDC-2110544.



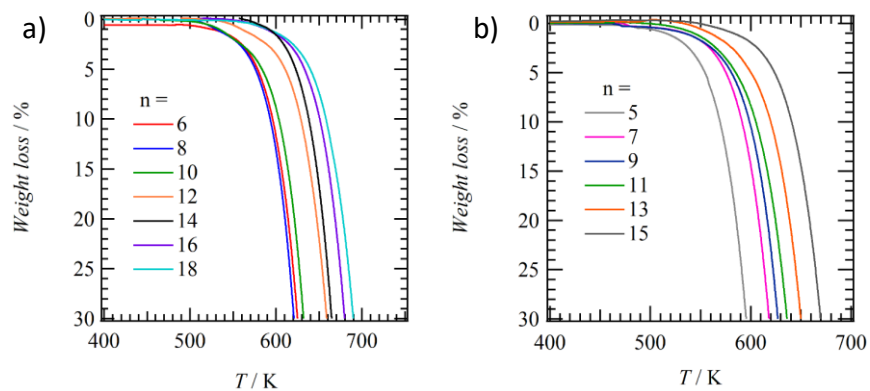

**Figure S1.** TG charts of **CnTPA**. a) Even-number and b) odd-number derivatives.

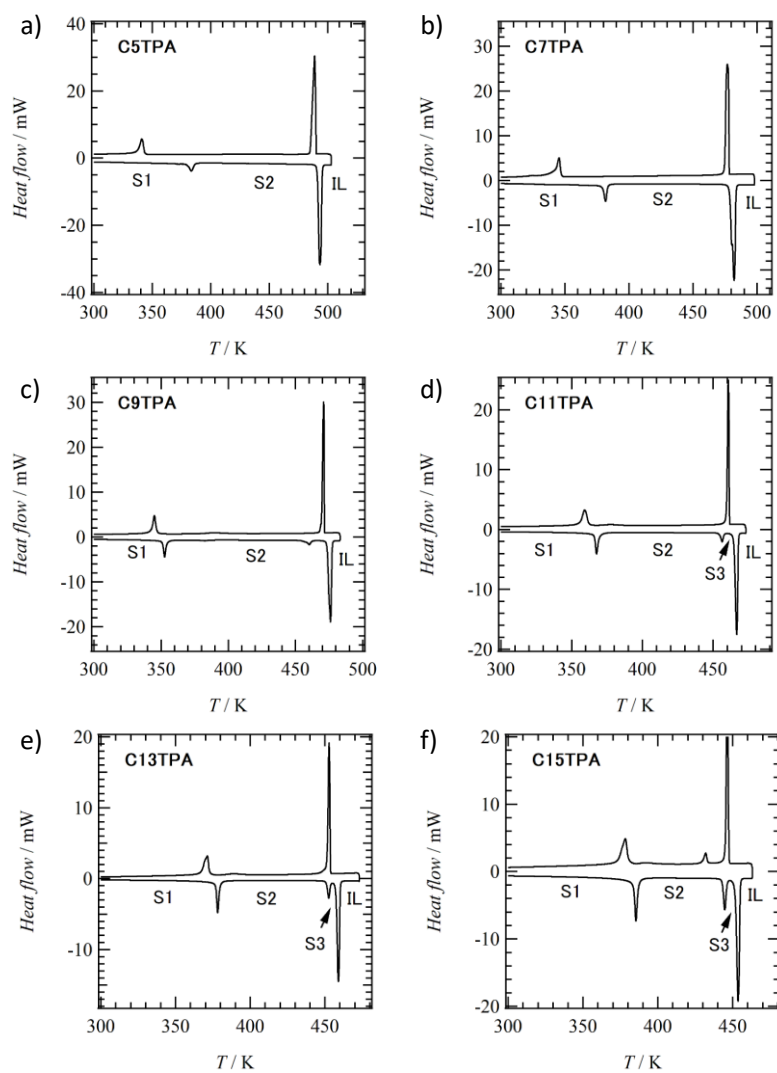

**Figure S2.** DSC charts of the odd-number **CnTPAs**. a) **C5TPA**, b) **C7TPA**, c) **C9TPA**, d) **C11TPA**, e) **C13TPA**, and f) **C15TPA**.

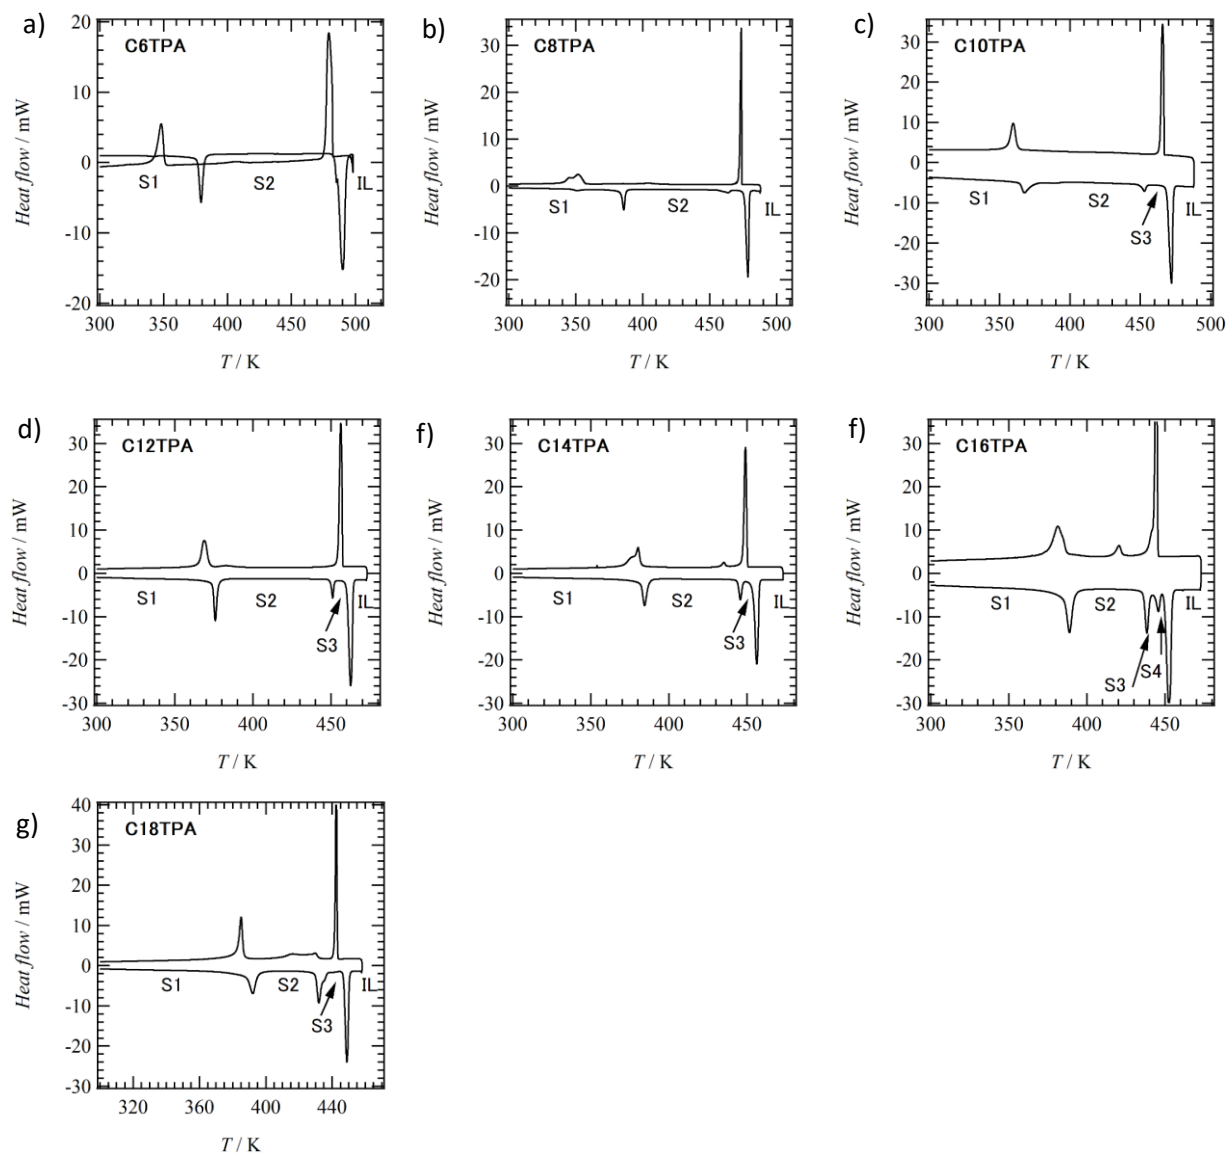

**Figure S3.** DSC charts of the even-number C<sub>n</sub>TPAs. a) C<sub>6</sub>TPA, b) C<sub>8</sub>TPA, c) C<sub>10</sub>TPA, d) C<sub>12</sub>TPA, e) C<sub>14</sub>TPA, f) C<sub>16</sub>TPA, and g) C<sub>18</sub>TPA.

**Table S1.** Phase transition behaviors of **CTPA**.

| Comp.         | Transition <sup>a</sup> | $T_{S-S}$ ,<br>K | $\Delta H$ ,<br>kJ mol <sup>-1</sup> | $\Delta S$ , kJ<br>mol <sup>-1</sup> K <sup>-1</sup> | $\Sigma\Delta H$ , <sup>b</sup><br>kJ mol <sup>-1</sup> | $\Sigma\Delta S$ , <sup>b</sup> kJ<br>mol <sup>-1</sup> K <sup>-1</sup> |
|---------------|-------------------------|------------------|--------------------------------------|------------------------------------------------------|---------------------------------------------------------|-------------------------------------------------------------------------|
| <b>C5TPA</b>  | S1-S2                   | 378.6            | -5.38                                | -14.2                                                | -48.2                                                   | -101.3                                                                  |
|               | S2-IL                   | 490.6            | -42.8                                | -87.1                                                |                                                         |                                                                         |
| <b>C6TPA</b>  | S1-S2                   | 373.7            | -8.6                                 | -22.7                                                | -41.4                                                   | -90.9                                                                   |
|               | S2-IL                   | 480.8            | -32.8                                | -68.2                                                |                                                         |                                                                         |
| <b>C7TPA</b>  | S1-S2                   | 379.3            | -7.3                                 | -19.3                                                | -55.8                                                   | -120.7                                                                  |
|               | S2-IL                   | 478.5            | -48.5                                | -101.4                                               |                                                         |                                                                         |
| <b>C8TPA</b>  | S1-S2                   | 346.0            | -1.9                                 | -5.46                                                | -57.2                                                   | -121.3                                                                  |
|               | S2-S3                   | 456.2            | -3.7                                 | -8.17                                                |                                                         |                                                                         |
|               | S3-IL                   | 471.6            | -51.6                                | -107.5                                               |                                                         |                                                                         |
| <b>C9TPA</b>  | S1-S2                   | 350.7            | -9.7                                 | -27.6                                                | -63.2                                                   | -141.0                                                                  |
|               | S2-S3                   | 453.6            | -4.0                                 | -8.9                                                 |                                                         |                                                                         |
|               | S3-IL                   | 473.3            | -49.5                                | -104.5                                               |                                                         |                                                                         |
| <b>C10TPA</b> | S1-S2                   | 362.8            | -12.4                                | -34.0                                                | -68.6                                                   | -154.5                                                                  |
|               | S2-S3                   | 448.5            | -3.9                                 | -8.78                                                |                                                         |                                                                         |
|               | S3-IL                   | 465.2            | -52.3                                | -111.7                                               |                                                         |                                                                         |
| <b>C11TPA</b> | S1-S2                   | 366.0            | -12.2                                | -17.2                                                | -68.2                                                   | -140.7                                                                  |
|               | S2-S3                   | 454.4            | -4.5                                 | -12.5                                                |                                                         |                                                                         |
|               | S3-IL                   | 464.5            | -51.5                                | -111.0                                               |                                                         |                                                                         |
| <b>C12TPA</b> | S1-S2                   | 360.6            | -19.2                                | -51.5                                                | -81.6                                                   | -187.8                                                                  |
|               | S2-S3                   | 445.6            | -6.3                                 | -14.0                                                |                                                         |                                                                         |
|               | S3-IL                   | 455.5            | -56.1                                | -122.3                                               |                                                         |                                                                         |
| <b>C13TPA</b> | S1-S2                   | 376.5            | -17.2                                | -45.8                                                | -81.0                                                   | -185.6                                                                  |
|               | S2-S3                   | 450.9            | -9.5                                 | -21.0                                                |                                                         |                                                                         |
|               | S3-IL                   | 460.2            | -54.3                                | -118.8                                               |                                                         |                                                                         |
| <b>C14TPA</b> | S1-S2                   | 380.7            | -20.4                                | -53.5                                                | -82.4                                                   | -191.0                                                                  |
|               | S2-S3                   | 441.9            | -10.5                                | -23.8                                                |                                                         |                                                                         |
|               | S3-IL                   | 449.7            | -51.5                                | -113.7                                               |                                                         |                                                                         |

|               |         |       |       |        |       |        |
|---------------|---------|-------|-------|--------|-------|--------|
| <b>C15TPA</b> | S1–S2   | 383.2 | –20.0 | –52.2  | –75.0 | –174.1 |
|               | S2–S3   | 442.8 | –1.4  | –3.1   |       |        |
|               | S3–IL   | 451.4 | –53.6 | –118.8 |       |        |
| <b>C16TPA</b> | S1–S2   | 381.6 | –21.8 | –56.7  | –92.8 | –216.6 |
|               | S2–S3   | 441.7 | –15.2 | –35.0  |       |        |
|               | S3–S4   | 433.9 | –8.6  | –19.5  |       |        |
|               | S4–IL   | 447.9 | –47.2 | –105.4 |       |        |
| <b>C18TPA</b> | S1–S2   | 385.8 | –25.5 | –65.9  | –98.7 | –232.0 |
|               | S2–S3   | 427.5 | –25.7 | –59.7  |       |        |
|               | (S3–S4) | 427.5 | –     | –      |       |        |
|               | S4–IL   | 445.1 | –47.5 | –106.4 |       |        |

<sup>a</sup> IL is isotropic liquid. <sup>b</sup>  $\Sigma\Delta H$  and  $\Sigma\Delta S$  were the sum of all phase transition enthalpy and entropy, respectively.

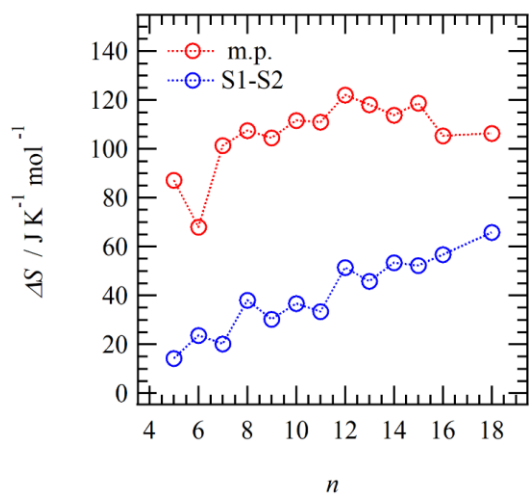

**Figure S4.** Even–odd effect of transition enthalpy change ( $\Delta S$ ) of S1–S2 phase transition (blue) and melting point (red).

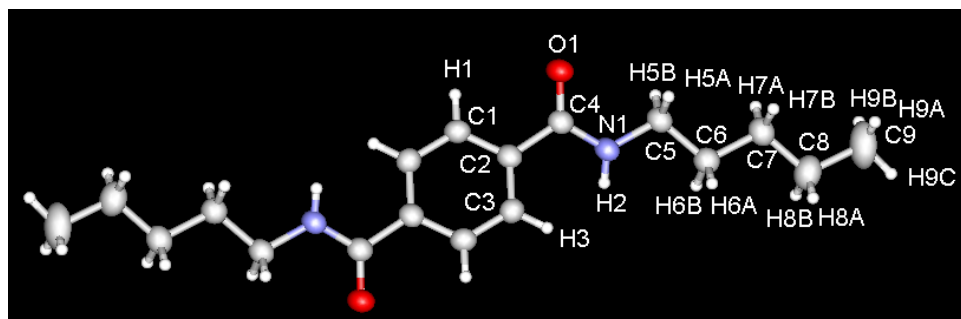

**Figure S5.** Atomic numbering scheme of **C5TPA** for the single-crystal X-ray structural analysis.

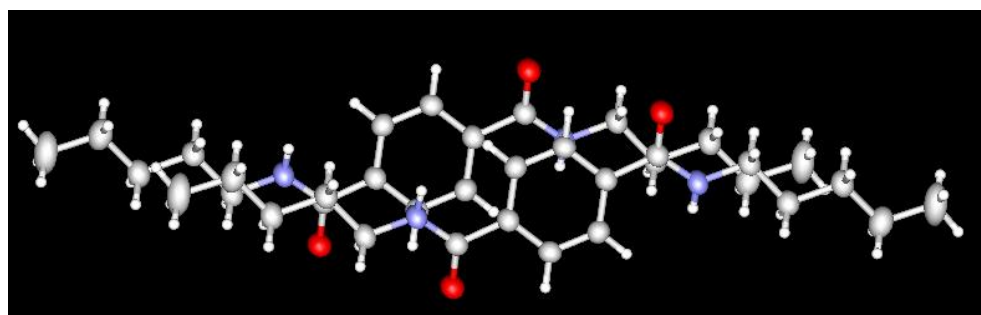

**Figure S6.** The  $\pi$ - $\pi$  overlap mode of **C5TPA**.

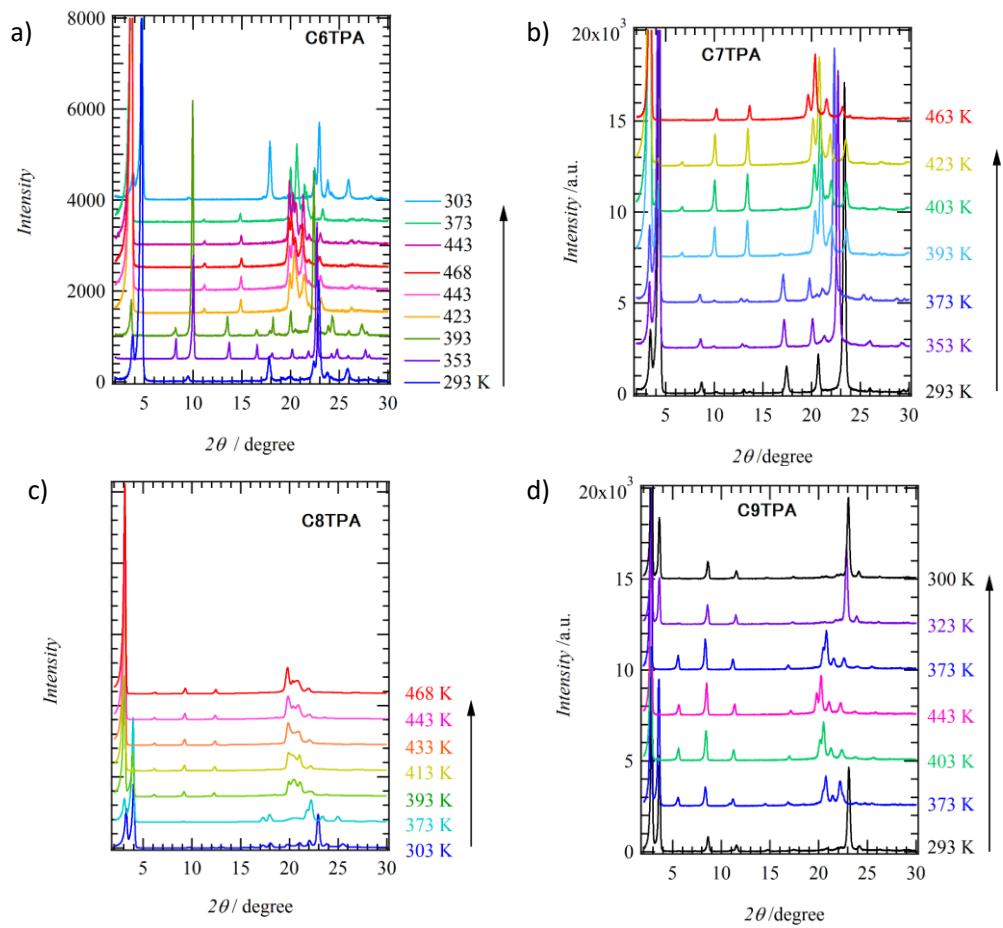

**Figure S7.** *T*-dependent PXRD patterns of a) C6TPA, b) C7TPA, c) C8TPA, and d) C9TPA.

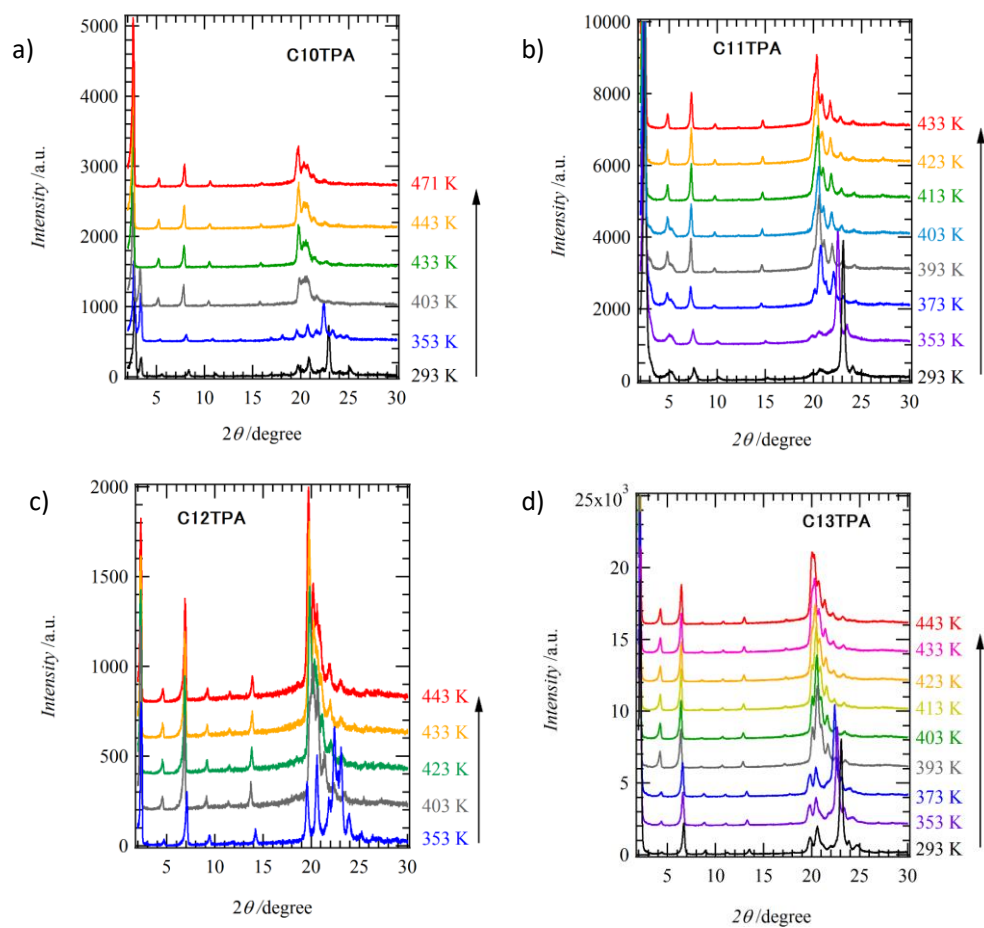

**Figure S8.** *T*-dependent PXRD patterns of a) C10TPA, b) C11TPA, c) C12TPA, and d) C13TPA.

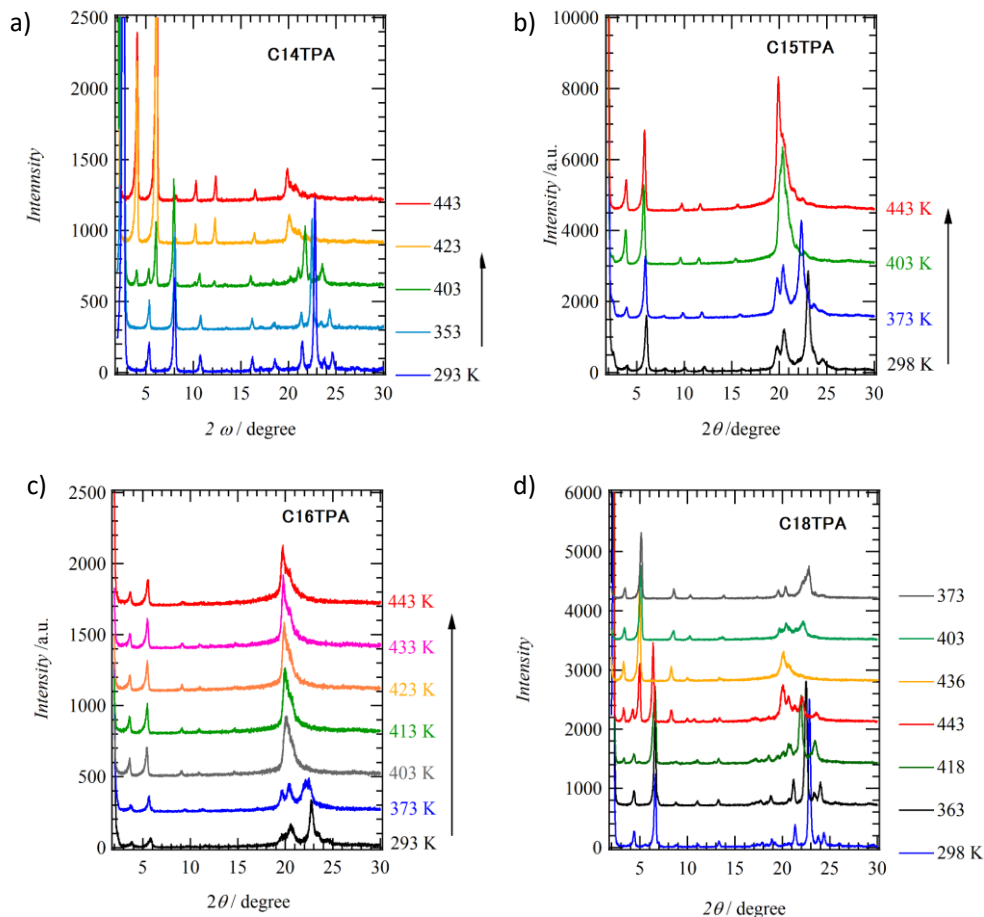

**Figure S9.** *T*-dependent PXRD patterns of a) **C14TPA**, b) **C15TPA**, c) **C16TPA**, and d) **C18TPA**.

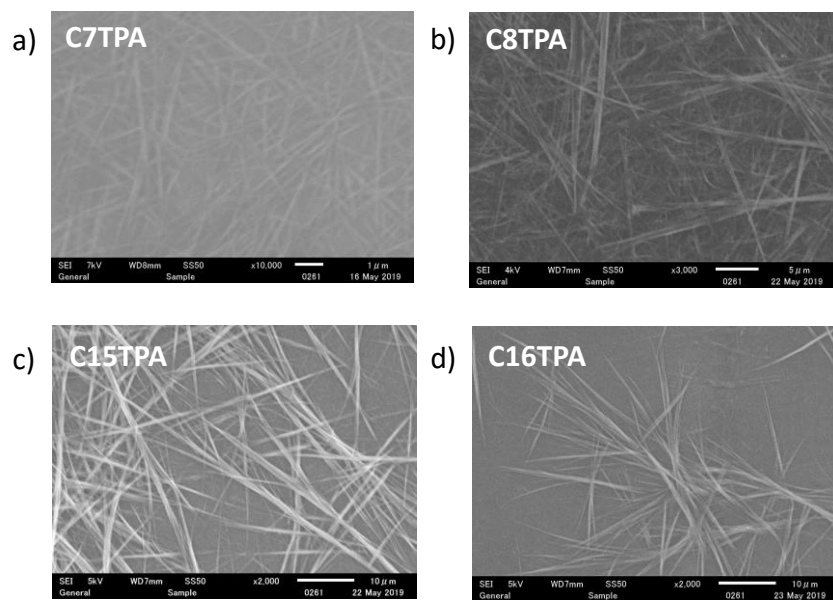

**Figure S10.** SEM images of a) **C7TPA** (area:  $1 \times 1 \mu\text{m}^2$ ), b) **C8TPA** (area:  $5 \times 5 \mu\text{m}^2$ ), c) **C15TPA** (area:  $10 \times 10 \mu\text{m}^2$ ), and d) **C16TPA** (area:  $10 \times 10 \mu\text{m}^2$ ).



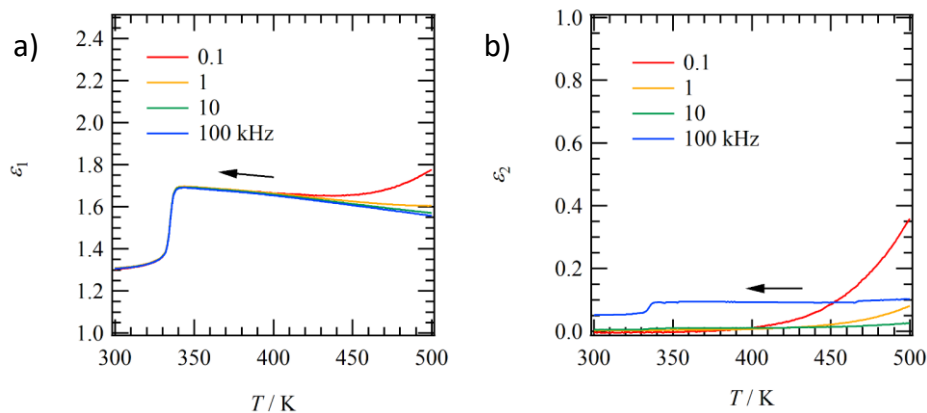

**Figure S11.** The  $T$ - and  $f$ -dependent a)  $\epsilon_1'$  and b)  $\epsilon_1''$  responses of **C5TPA** in the cooling process from IL.

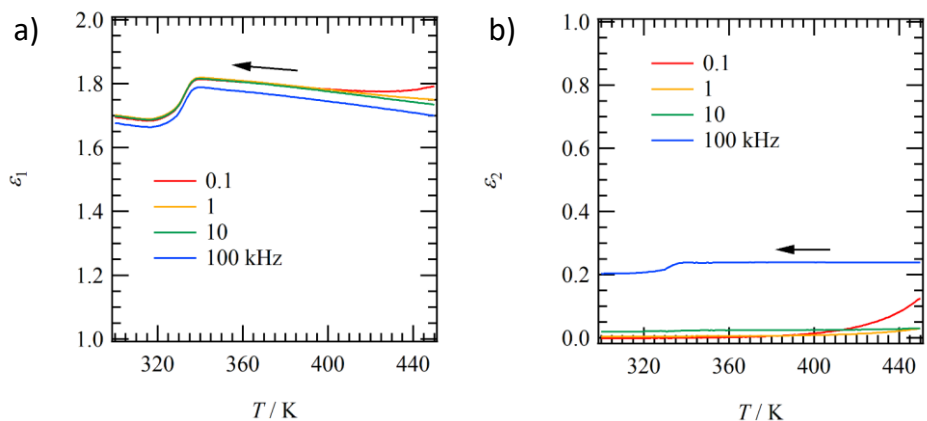

**Figure S12.** The  $T$ - and  $f$ -dependent a)  $\epsilon_1'$  and b)  $\epsilon_1''$  responses of **C6TPA** in the cooling process from IL.

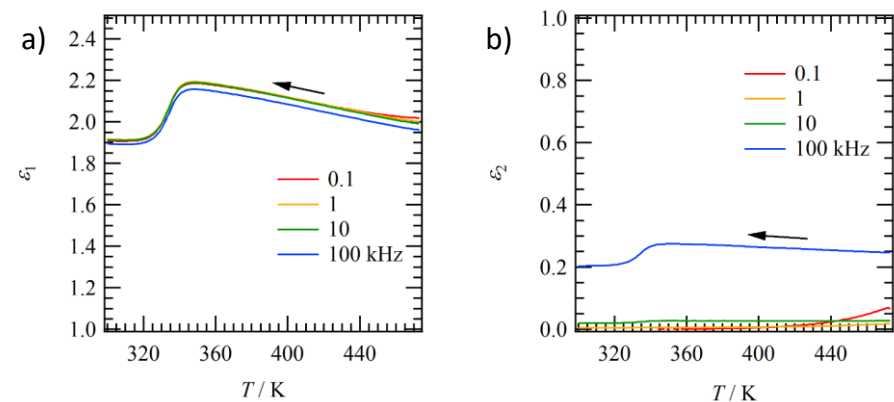

**Figure S13.** The  $T$ - and  $f$ -dependent a)  $\epsilon_1'$  and b)  $\epsilon_1''$  responses of **C7TPA** in the cooling process from IL.

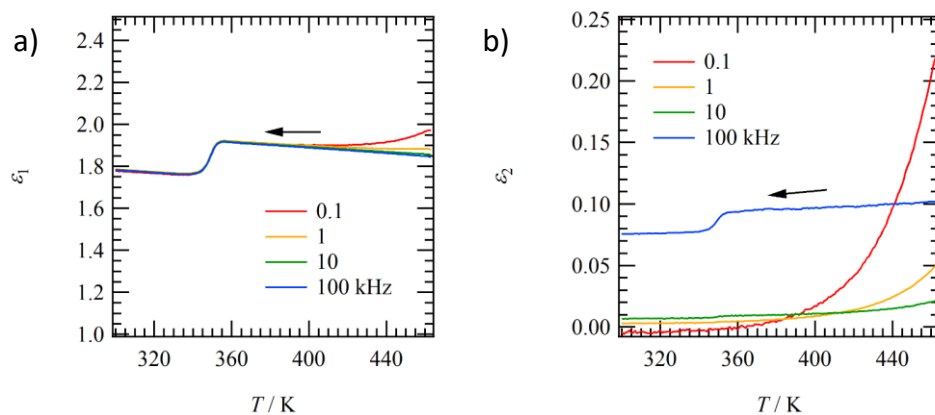

**Figure S14.** The  $T$ - and  $f$ -dependent a)  $\epsilon_1$  and b)  $\epsilon_2$  responses of **C8TPA** in the cooling process from IL.

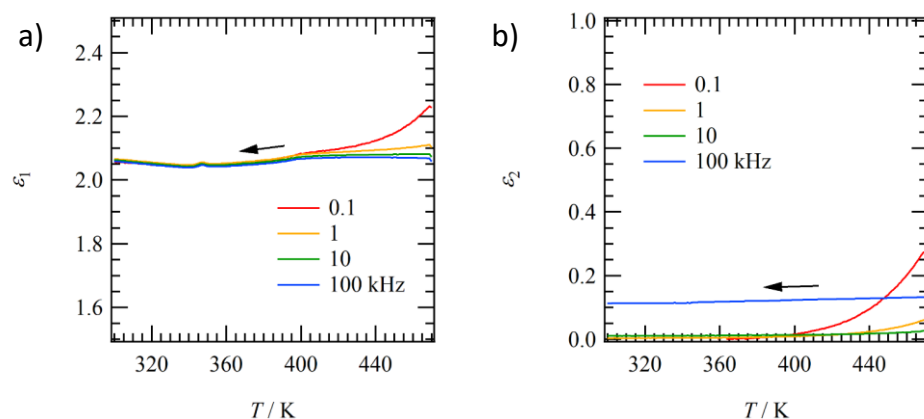

**Figure S15.** The  $T$ - and  $f$ -dependent a)  $\epsilon_1$  and b)  $\epsilon_2$  responses of **C9TPA** in the cooling process from IL.

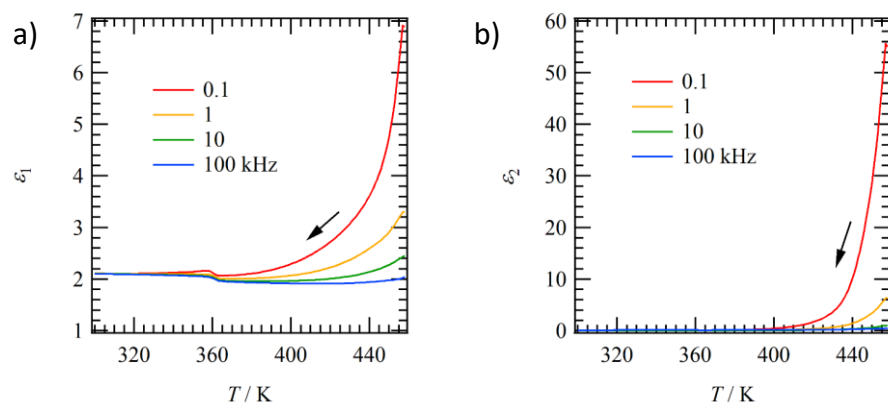

**Figure S16.** The  $T$ - and  $f$ -dependent a)  $\epsilon_1$  and b)  $\epsilon_2$  responses of **C10TPA** in the cooling process from IL.

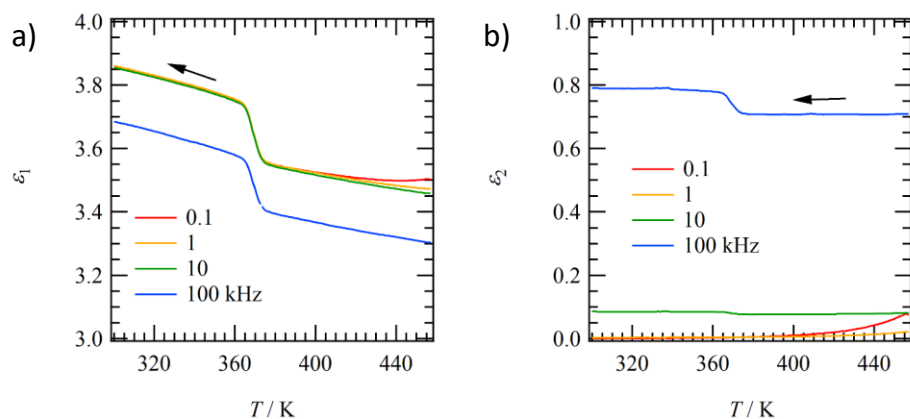

**Figure S17** The  $T$ - and  $f$ -dependent a)  $\epsilon_1$  and b)  $\epsilon_2$  responses of **C11TPA** in the cooling process from IL.

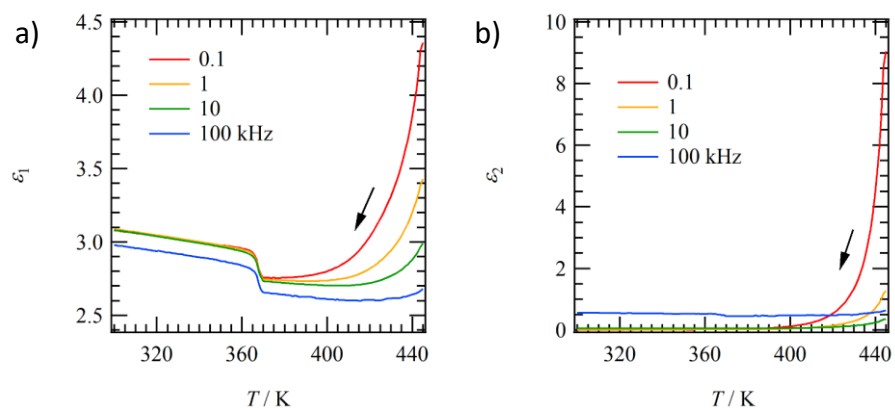

**Figure S18.** The  $T$ - and  $f$ -dependent a)  $\epsilon_1$  and b)  $\epsilon_2$  responses of **C12TPA** in the cooling process from IL.

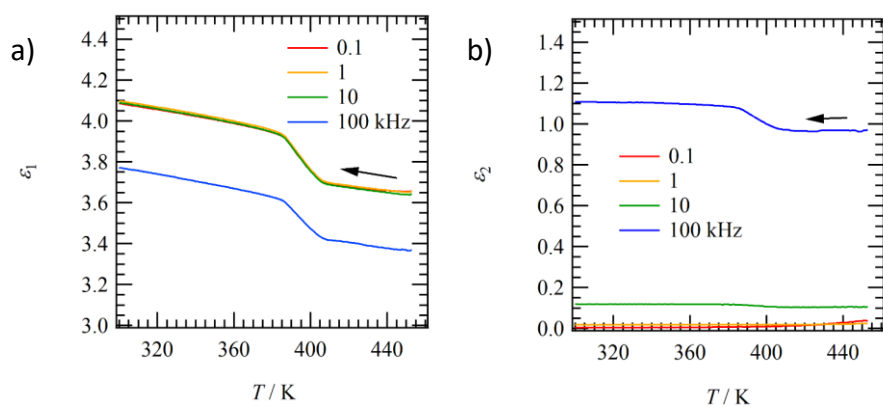

**Figure S19.** The  $T$ - and  $f$ -dependent a)  $\epsilon_1$  and b)  $\epsilon_2$  responses of **C13TPA** in the cooling process from IL.

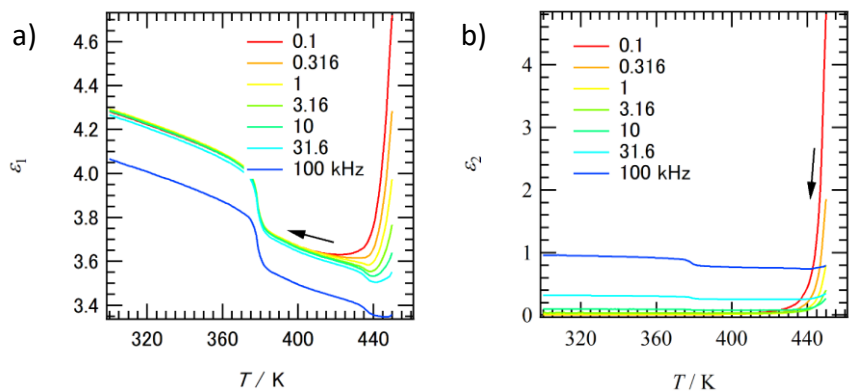

**Figure S20.** The  $T$ - and  $f$ -dependent a)  $\epsilon_1$  and b)  $\epsilon_2$  responses of **C14TPA** in the cooling process from IL.

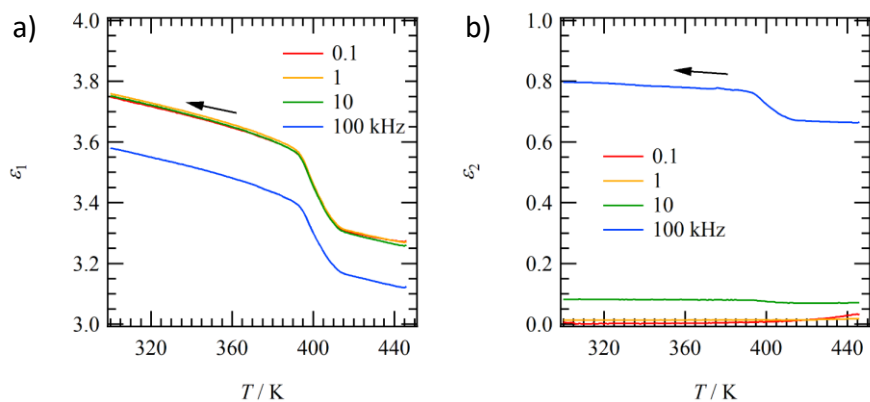

**Figure S21.** The  $T$ - and  $f$ -dependent a)  $\epsilon_1$  and b)  $\epsilon_2$  responses of **C15TPA** in the cooling process from IL.

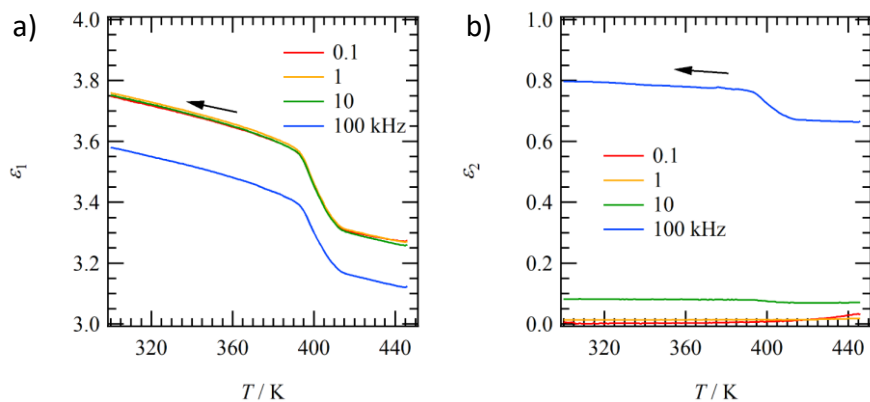

**Figure S22.** The  $T$ - and  $f$ -dependent a)  $\epsilon_1$  and b)  $\epsilon_2$  responses of **C16TPA** in the cooling process from IL.

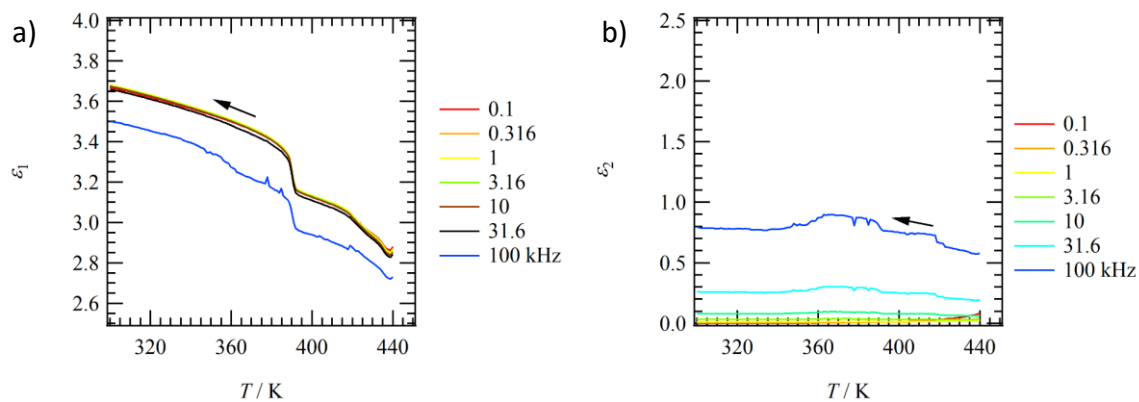

**Figure S23.** The  $T$ - and  $f$ -dependent a)  $\epsilon_1$  and b)  $\epsilon_2$  responses of **C18TPA** in the cooling process from IL.

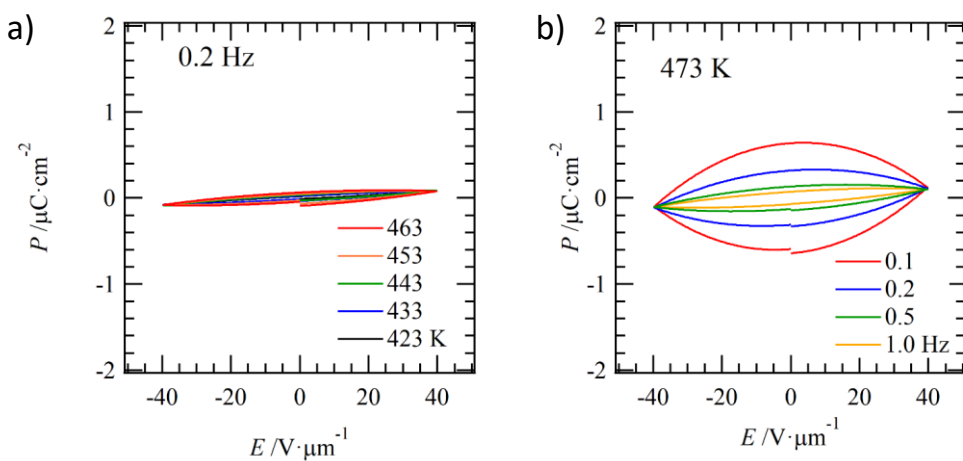

**Figure S24.** The  $P - E$  hysteresis measurement of **C5TPA** for a) the  $T$ -dependence at  $f = 0.2$  Hz and b) the  $f$ -dependence at 473 K.

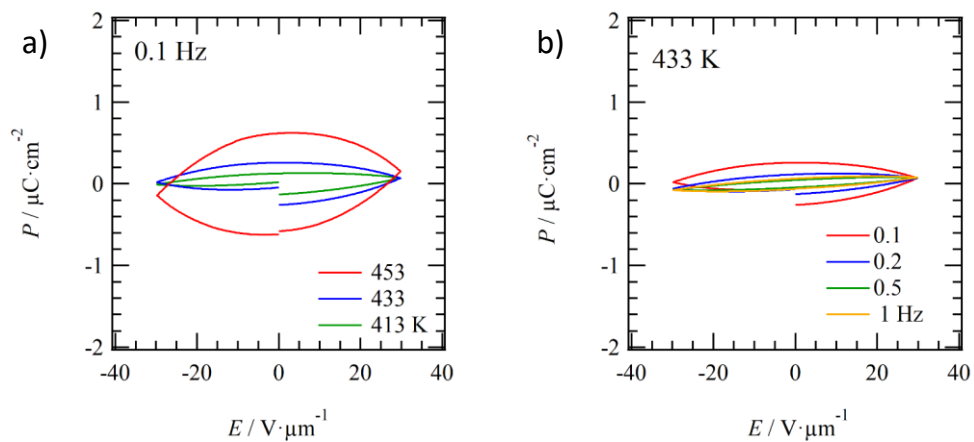

**Figure S25.** The  $P - E$  hysteresis measurement of **C6TPA** for a) the  $T$ -dependence at  $f = 0.1$  Hz and b) the  $f$ -dependence at 433 K.

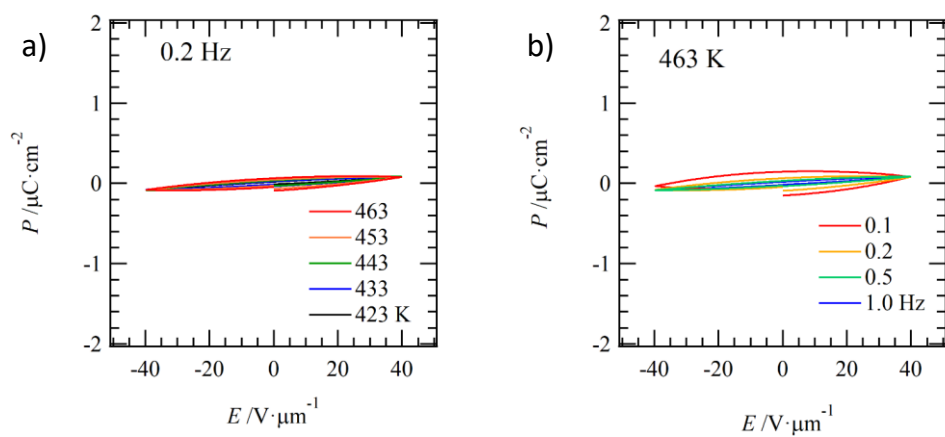

**Figure S26.** The  $P - E$  hysteresis measurement of **C7TPA** for a) the  $T$ -dependence at  $f = 0.1$  Hz and b) the  $f$ -dependence at 453 K.

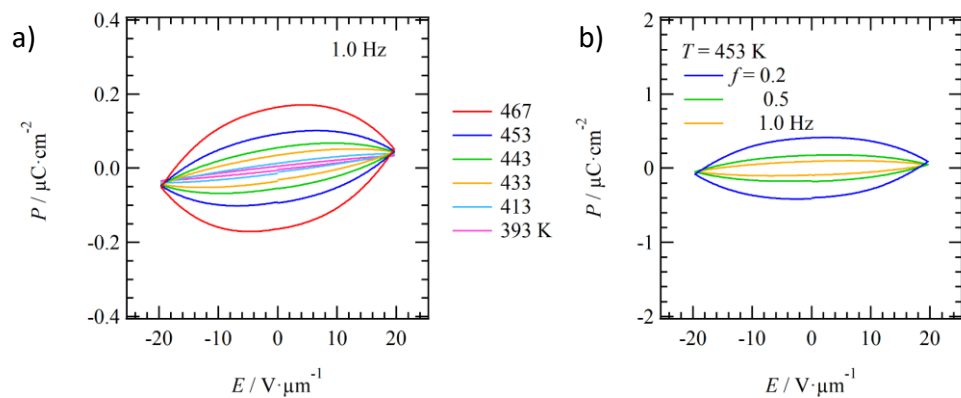

**Figure S27.** The  $P - E$  hysteresis measurement of **C8TPA** for a) the  $T$ -dependence at  $f = 0.1$  Hz and b) the  $f$ -dependence at 453 K.

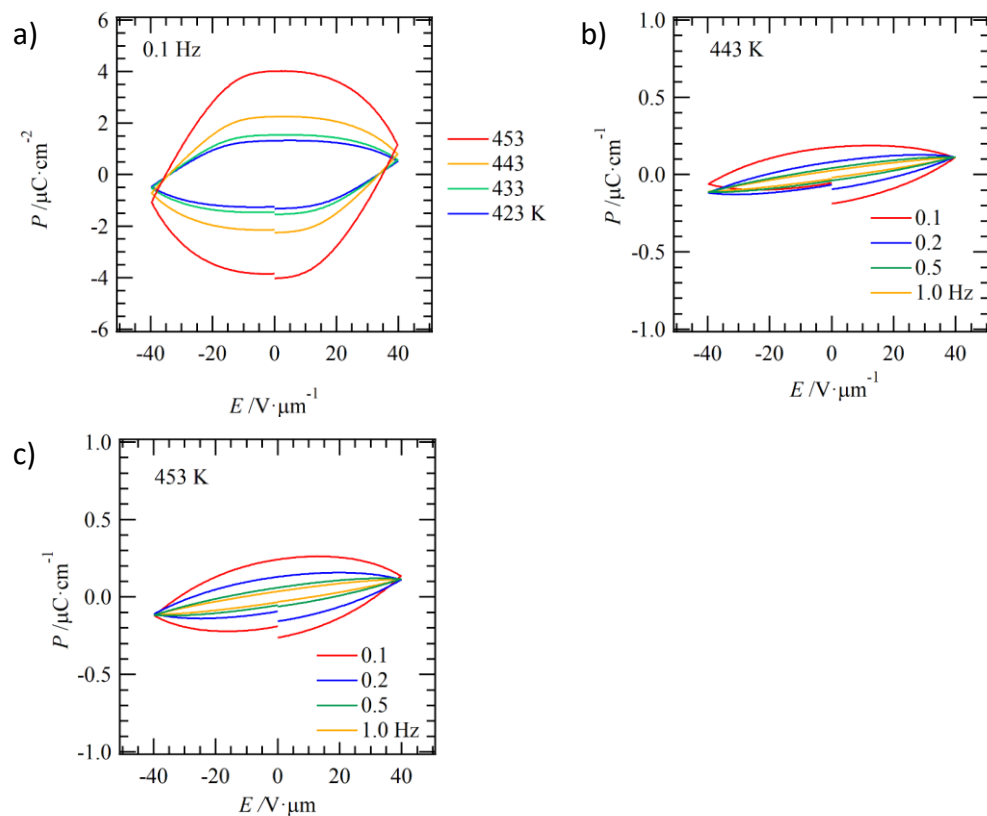

**Figure S28.** The  $P - E$  hysteresis measurement of **C9TPA** for a) the  $T$ -dependence at  $f = 0.1$  Hz, b) the  $f$ -dependence at 443 K, and c) the  $f$ -dependence at 453 K.

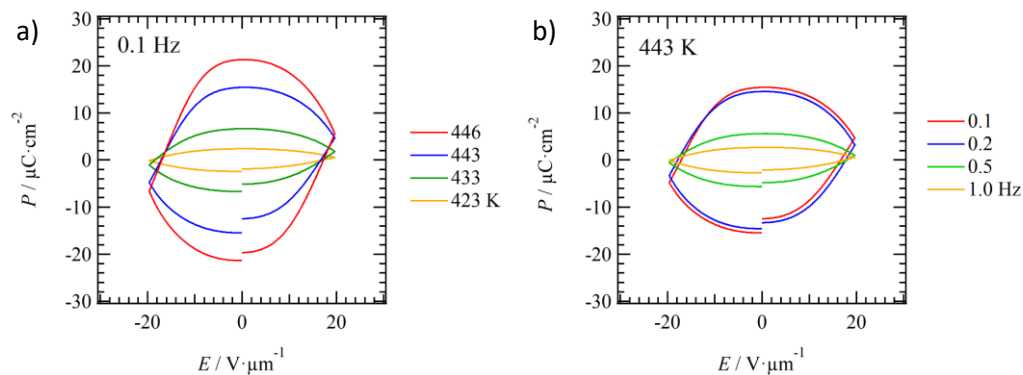

**Figure S29.** The  $P - E$  hysteresis measurement of **C10TPA** for a) the  $T$ -dependence at  $f = 0.1$  Hz and b) the  $f$ -dependence at 443 K.

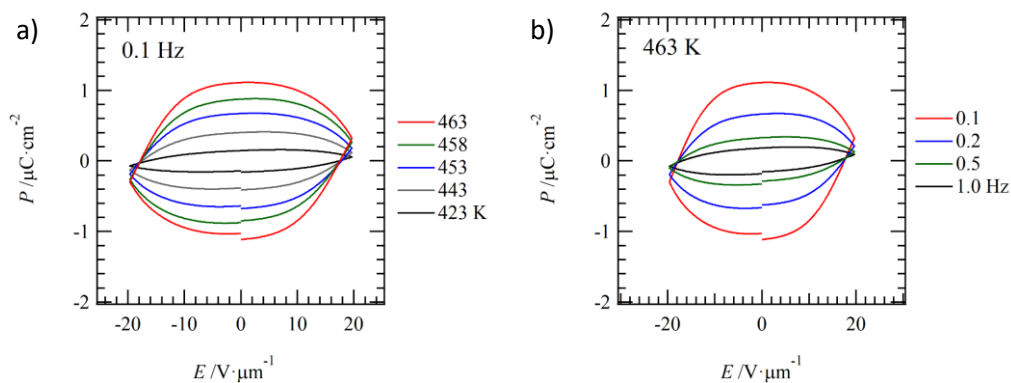

**Figure S30.** The  $P - E$  hysteresis measurement of **C11TPA** for a) the  $T$ -dependence at  $f = 0.1$  Hz and b) the  $f$ -dependence at 463 K.

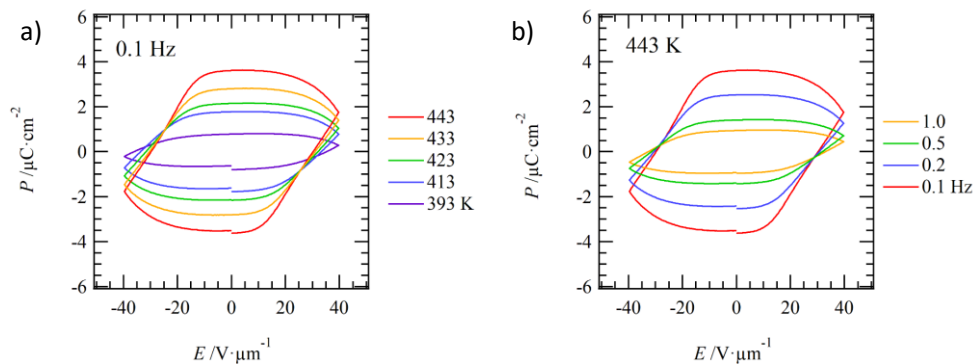

**Figure S31.** The  $P - E$  hysteresis measurement of **C12TPA** for a) the  $T$ -dependence at  $f = 0.1$  Hz and b) the  $f$ -dependence at 443 K.



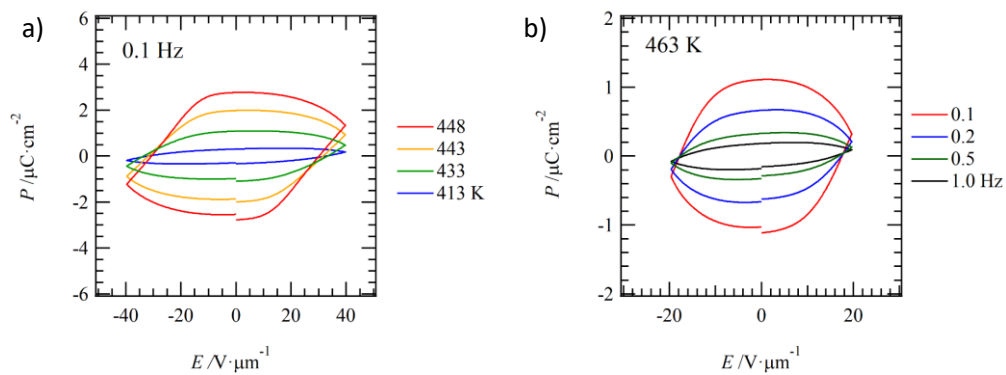

**Figure S32.** The  $P - E$  hysteresis measurement of **C13TPA** for a) the  $T$ -dependence at  $f = 0.1$  Hz and b) the  $f$ -dependence at 463 K.

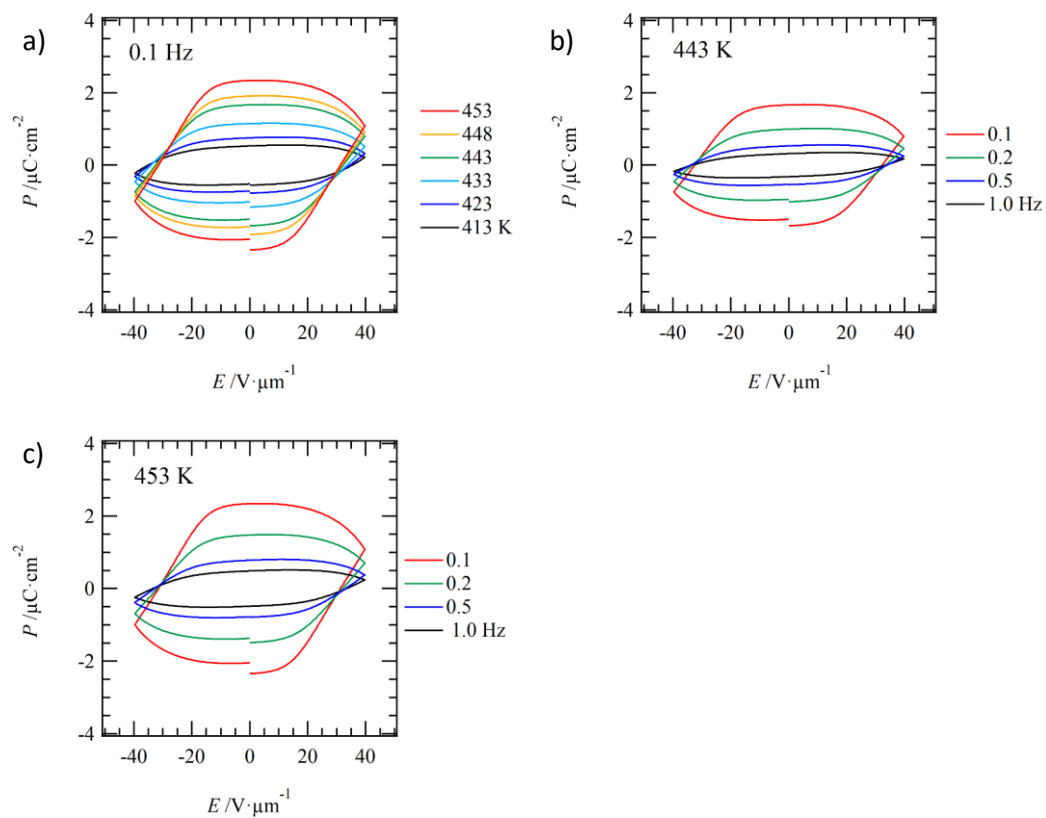

**Figure S33.** The  $P - E$  hysteresis measurement of **C14TPA** for a) the  $T$ -dependence at  $f = 0.1$  Hz, b) the  $f$ -dependence at 443 K, and c) the  $f$ -dependence at 453 K.

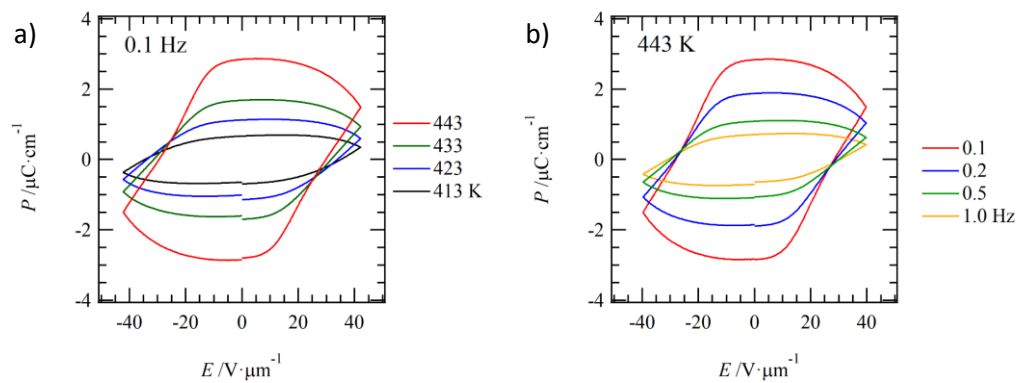

**Figure S34.** The  $P - E$  hysteresis measurement of **C15TPA** for a) the  $T$ -dependence at  $f = 0.1$  Hz and b) the  $f$ -dependence at 443 K.

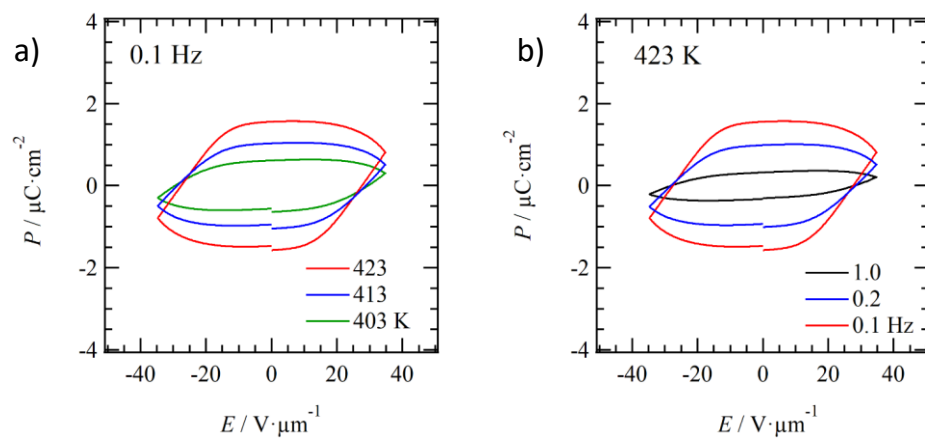

**Figure S35.** The  $P - E$  hysteresis measurement of **C16TPA** for a) the  $T$ -dependence at  $f = 0.1$  Hz and b) the  $f$ -dependence at 423 K.

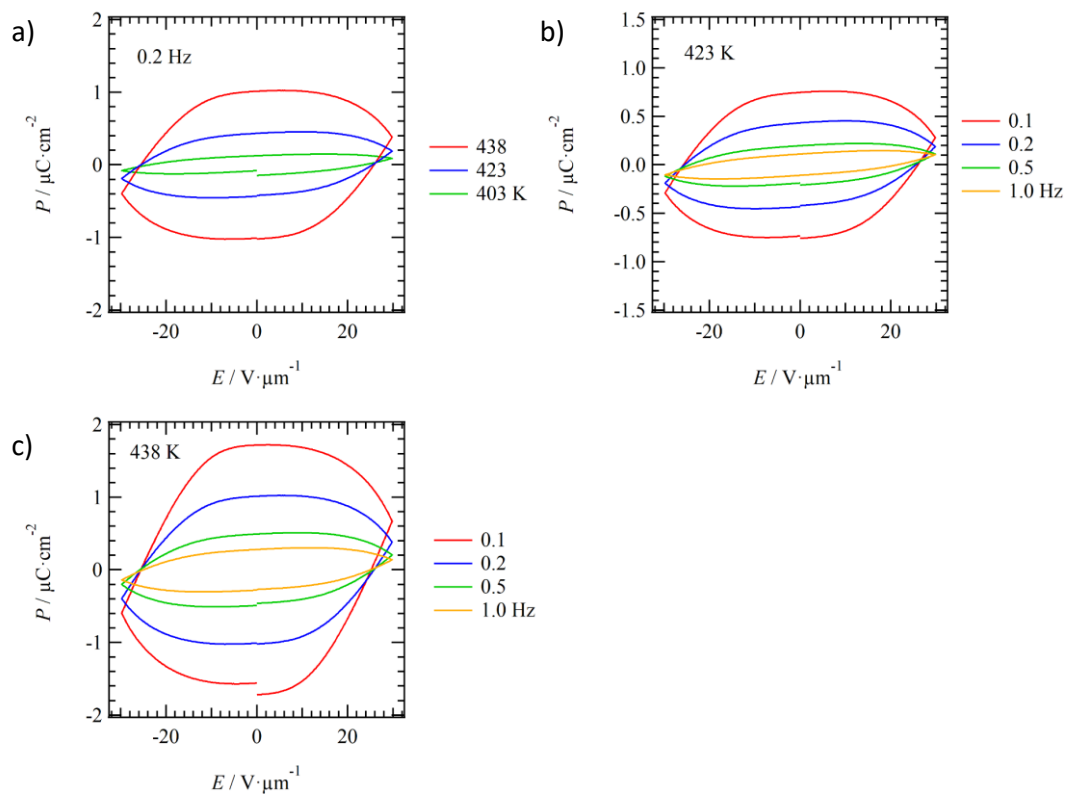

**Figure S36.** The  $P - E$  hysteresis measurement of **C18TPA** for a) the  $T$ -dependence at  $f = 0.2$  Hz, b) the  $f$ -dependence at 423 K, and c) the  $f$ -dependence at 438 K.

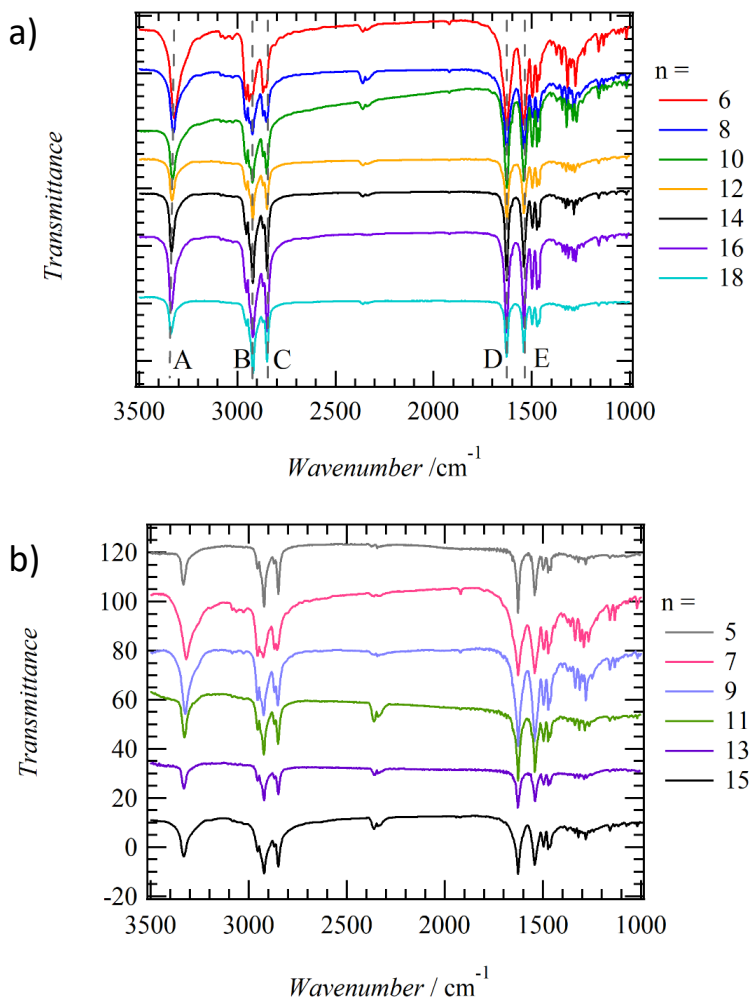

**Figure S37.** The IR spectra of a) the even-number and b) the odd-number **C<sub>n</sub>TPAs** at 298 K on KBr pellets.

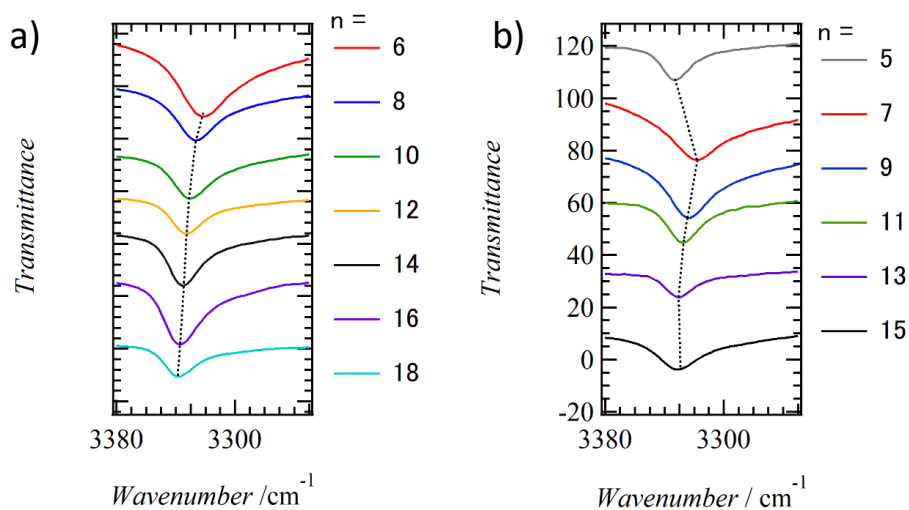

**Figure S38.** The IR spectra in the energy range 3380 – 3250  $\text{cm}^{-1}$  of a) the even-number and b) the odd-number **C<sub>n</sub>TPAs** at 298 K on KBr pellets.

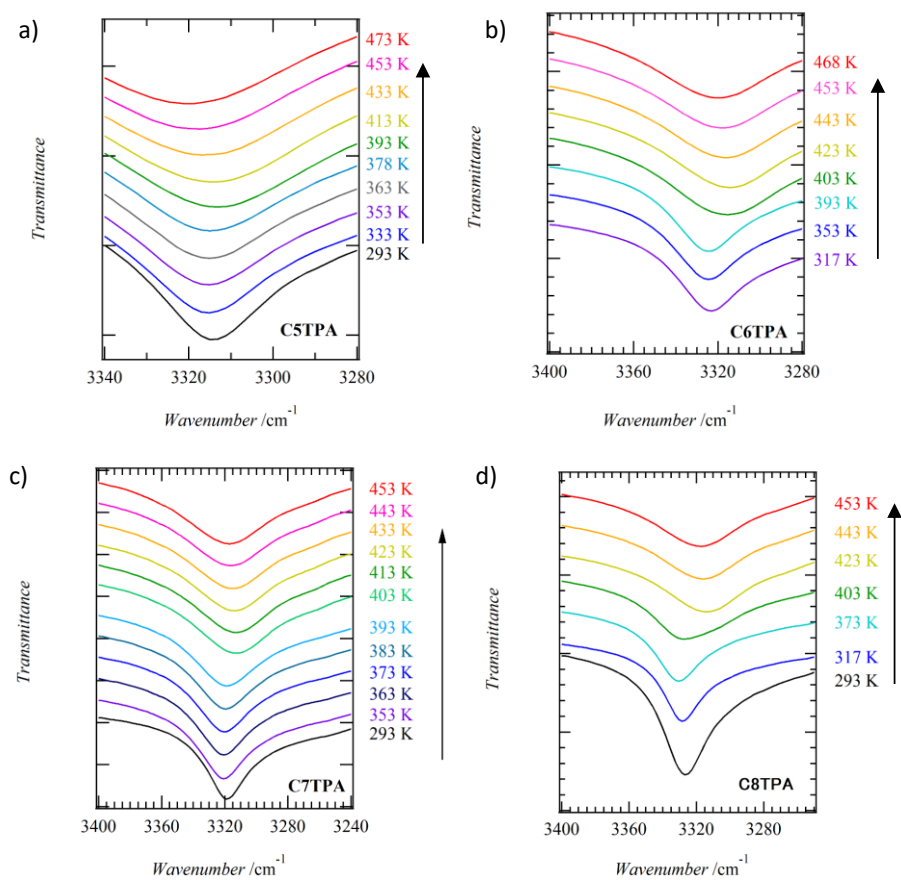

**Figure S39.** *T*-dependent IR spectra in the energy range 3400 – 3240  $\text{cm}^{-1}$  of a) **C5TPA**, b) **C6TPA**, c) **C7TPA**, and **C8TPAs** in the heating process on KBr pellets.

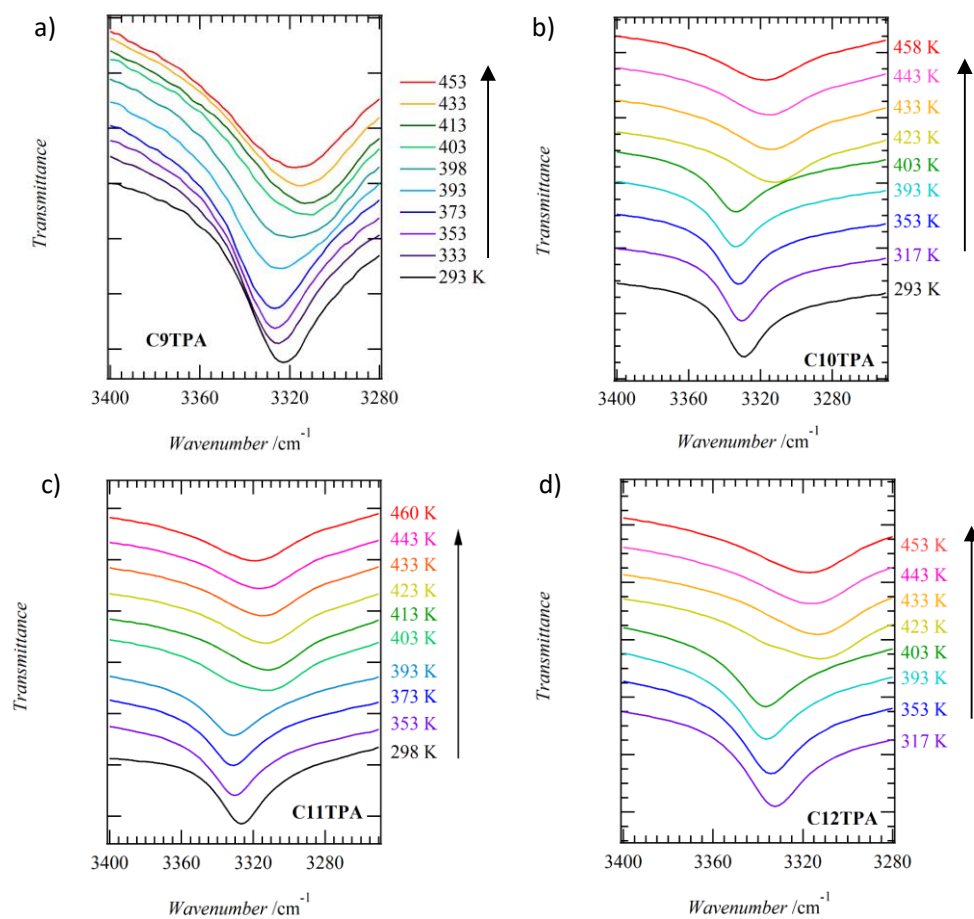

**Figure S40.** *T*-dependent IR spectra in the energy range 3400 – 3240  $\text{cm}^{-1}$  of a) **C9TPA**, b) **C10TPA**, c) **C11TPA**, and **C12TPAs** in the heating process on KBr pellets.

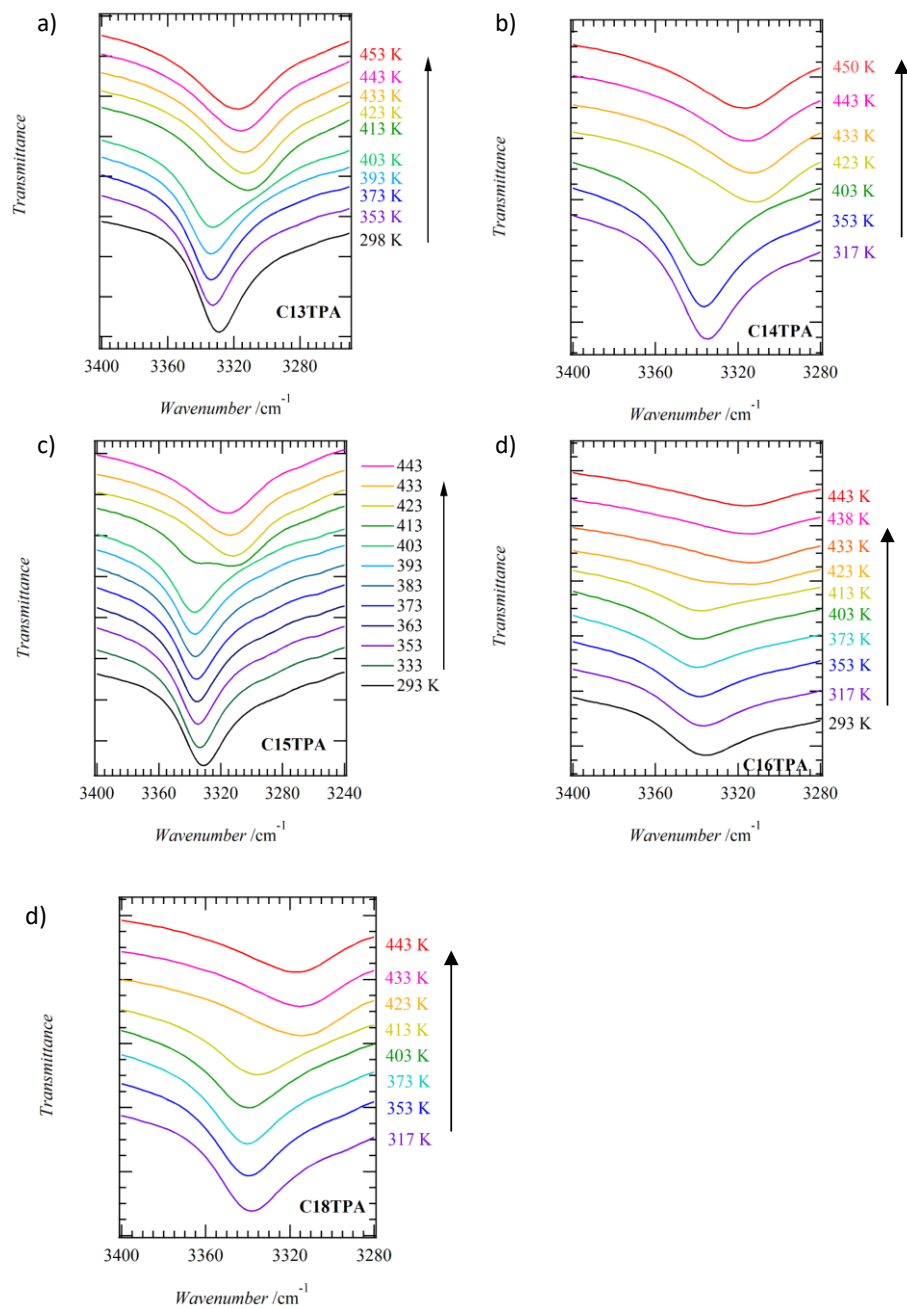

**Figure S41.** *T*-dependent IR spectra in the energy range 3400 – 3240  $\text{cm}^{-1}$  of a) **C13TPA**, b) **C14TPA**, c) **C15TPA**, d) **C16TPA**, and **C18TPAs** in the heating process on KBr pellets.

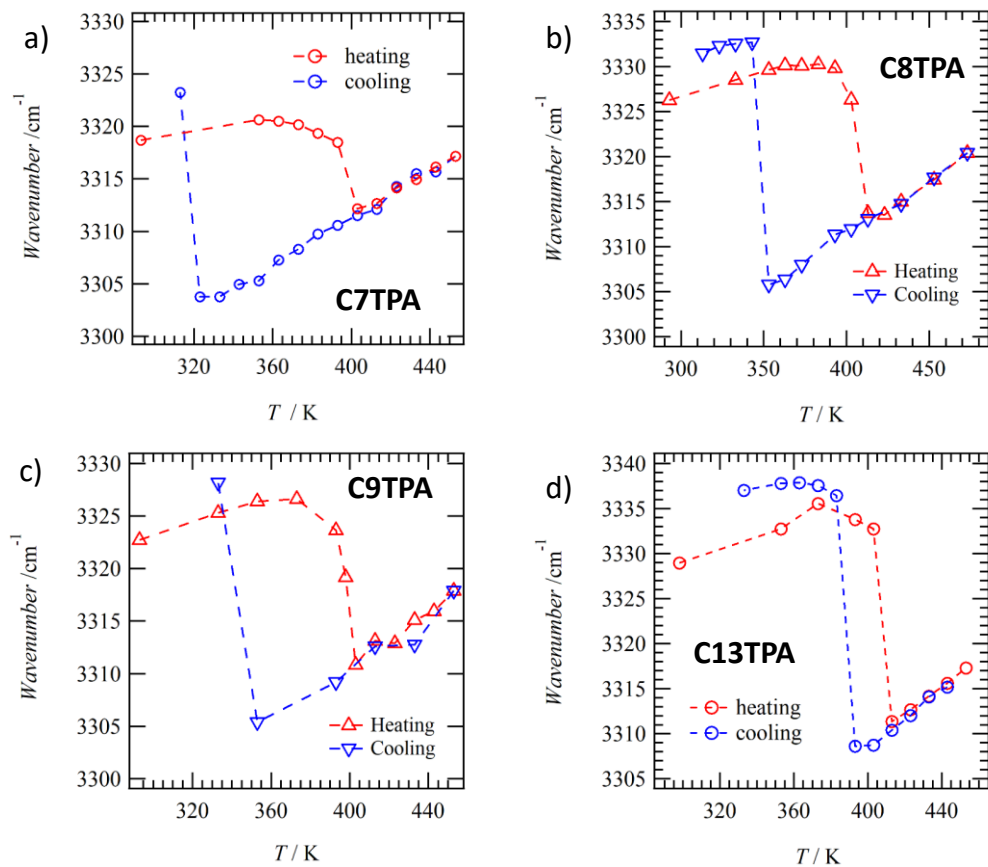

**Figure S42.**  $T$ -dependent energy shift of  $\nu_{N-H}$  mode for a) **C7TPA**, b) **C8TPA**, c) **C9TPA**, and **C13TPA**.
